# Supplementary material for: Microwave-assisted, sequential four-component synthesis of polysubstituted 5,6-dihydroquinazolinones from acyclic precursors and a mild, halogenation-initiated method for their aromatization under focused microwave irradiation
Source: Royal Society of Chemistry journal article supplement (doi:10.1039/c2gc36221j), 2012-11-27

***SUPPORTING INFORMATION***

**Microwave-assisted, sequential four-component synthesis of polysubstituted 5,6-dihydroquinazolinones from acyclic precursors and a mild, halogenation-initiated method for their aromatization under focused microwave irradiation**

**Damiano Rocchi, J. Francisco González and J. Carlos Menéndez\***

Departamento de Química Orgánica y Farmacéutica, Facultad de Farmacia,

Universidad Complutense, 28040 Madrid, Spain

josecm@farm.ucm.es

Ethyl-6-butylamino-2,4-diphenyl-2,3-dihydrobenzoate **4a**

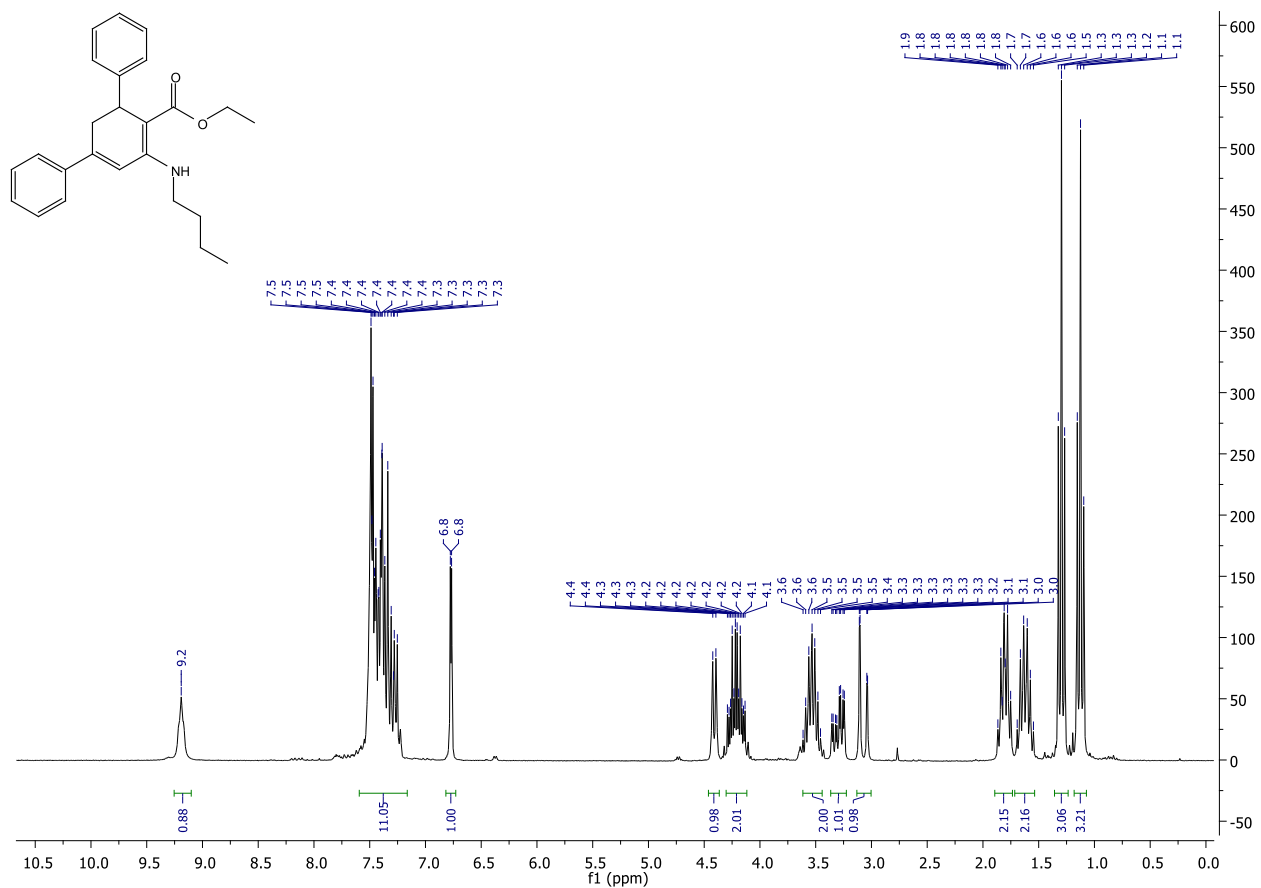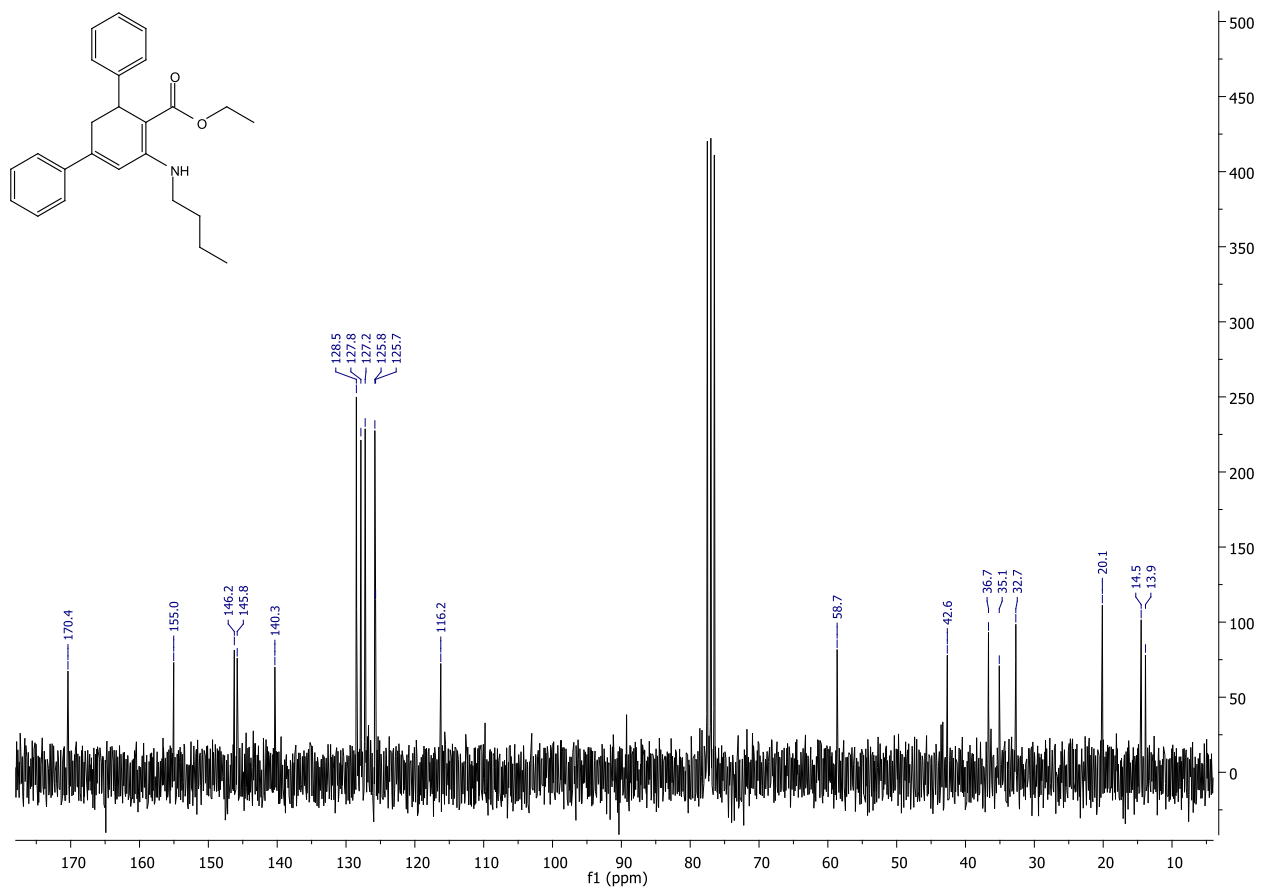

Ethyl-6-amino-2,4-diphenyl-2,3-dihydrobenzoate **5a**.

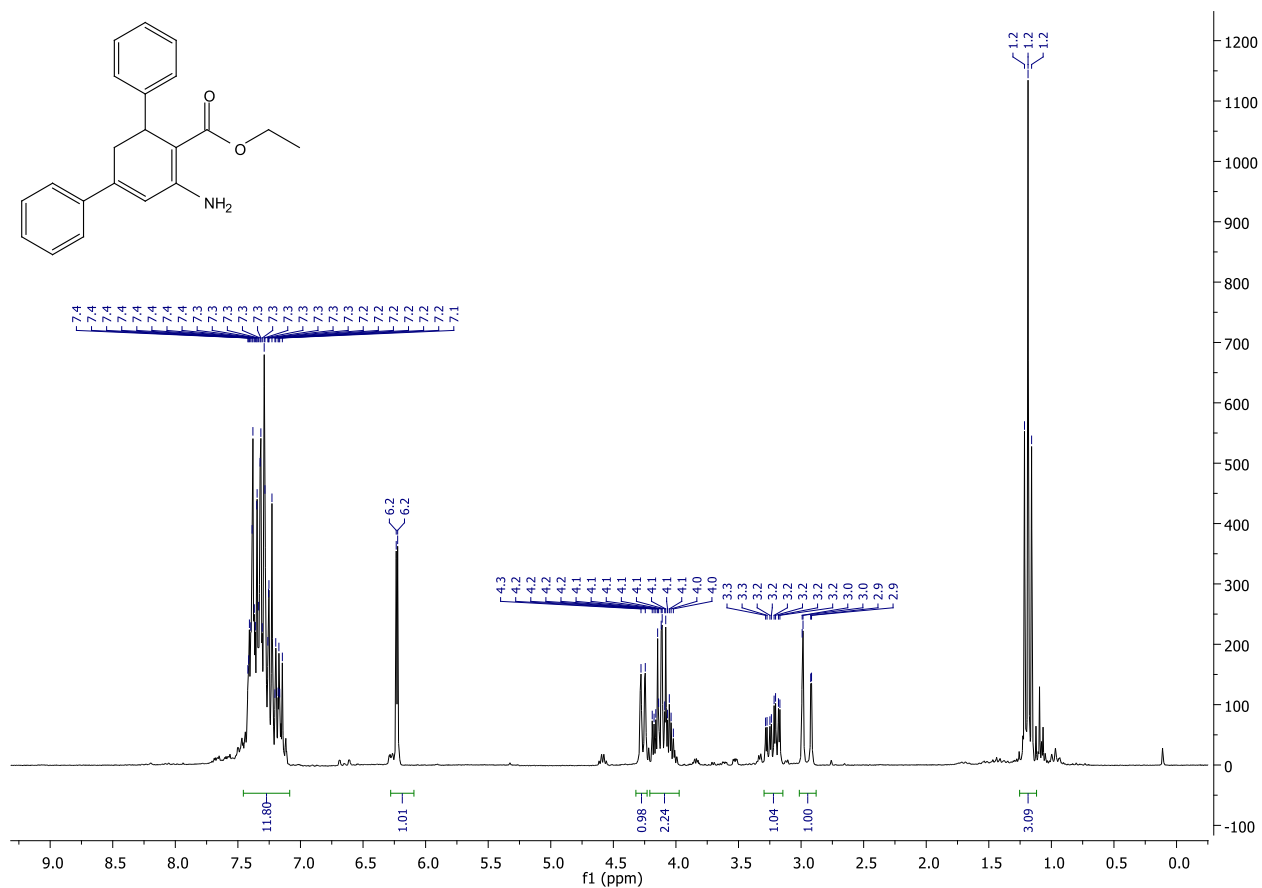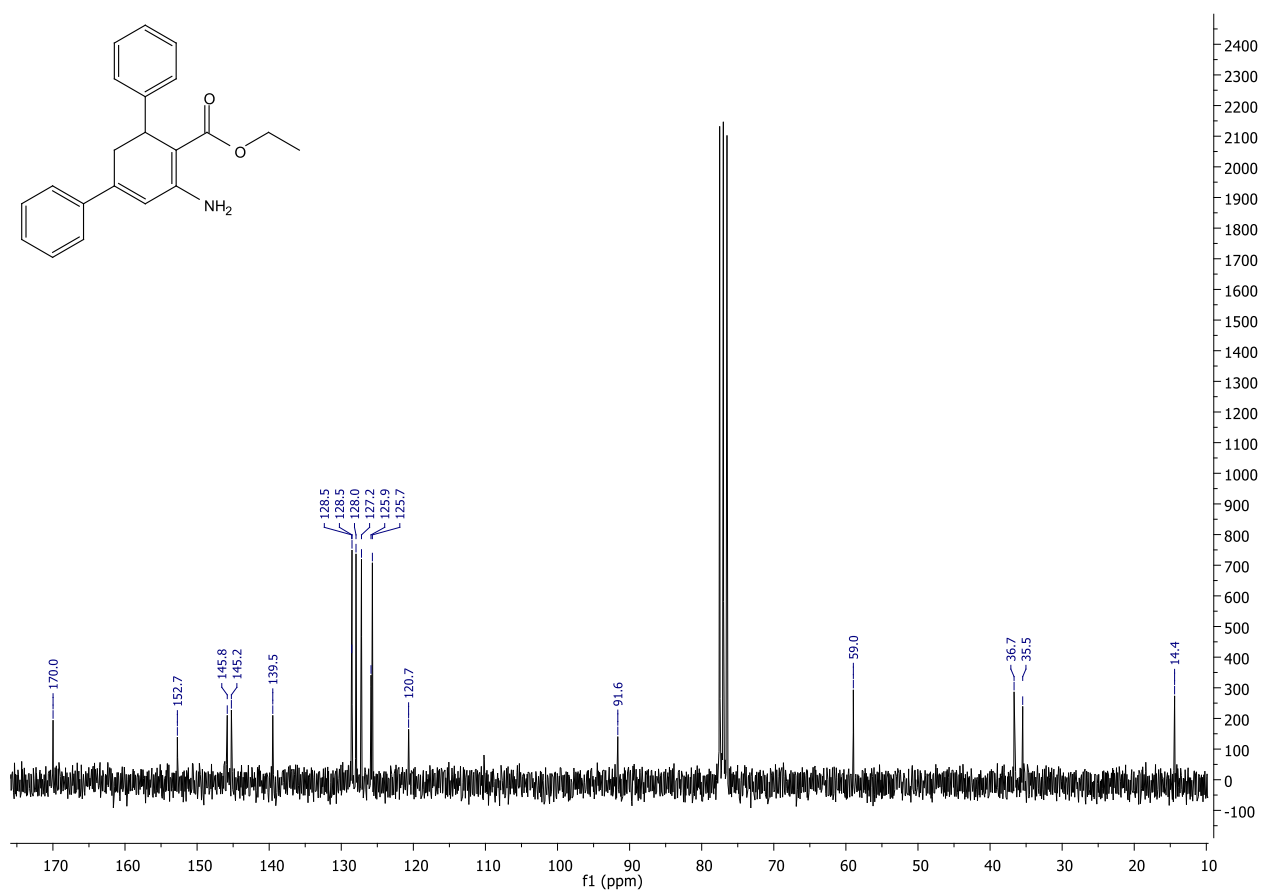

5,7-Diphenyl-5,6-dihydroquinazolin-4(3H)-one 7a

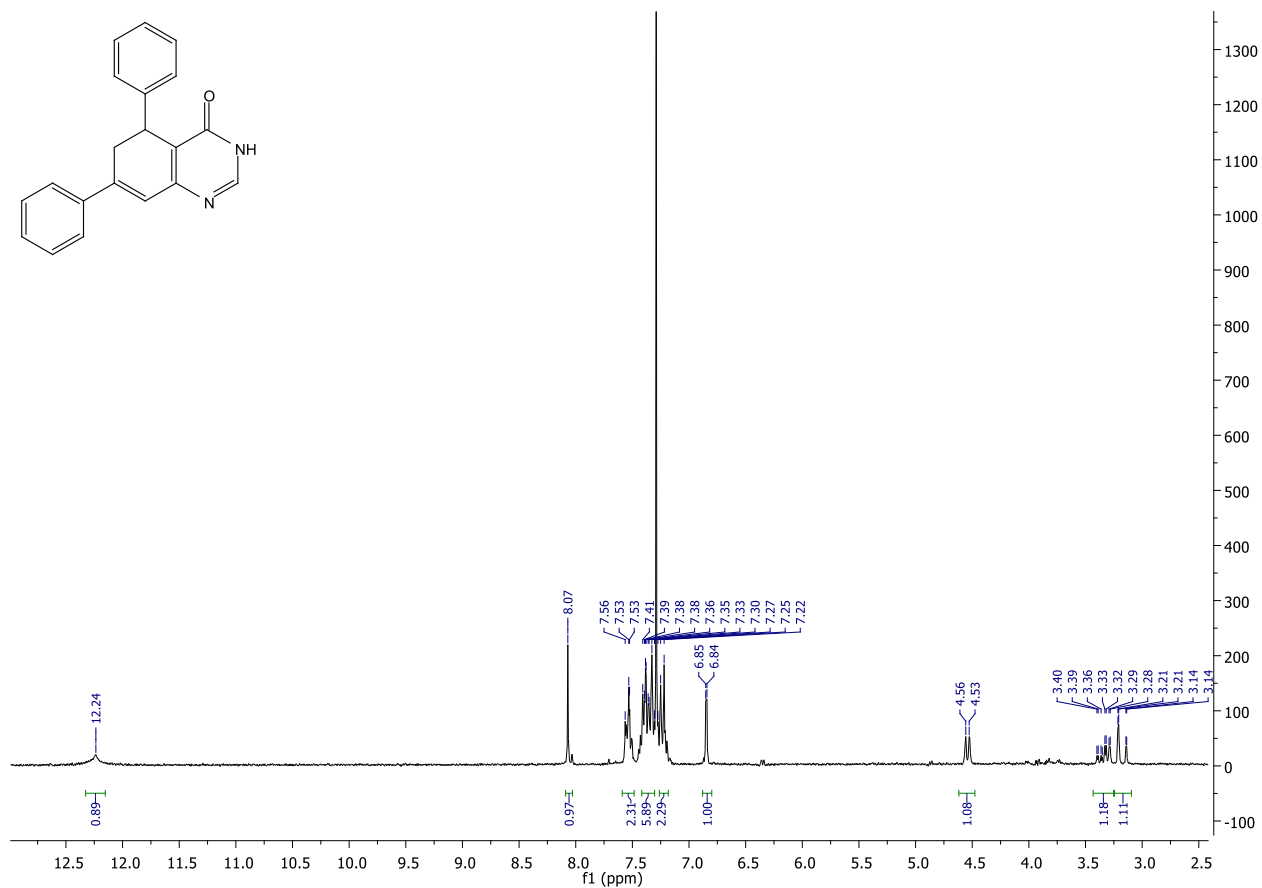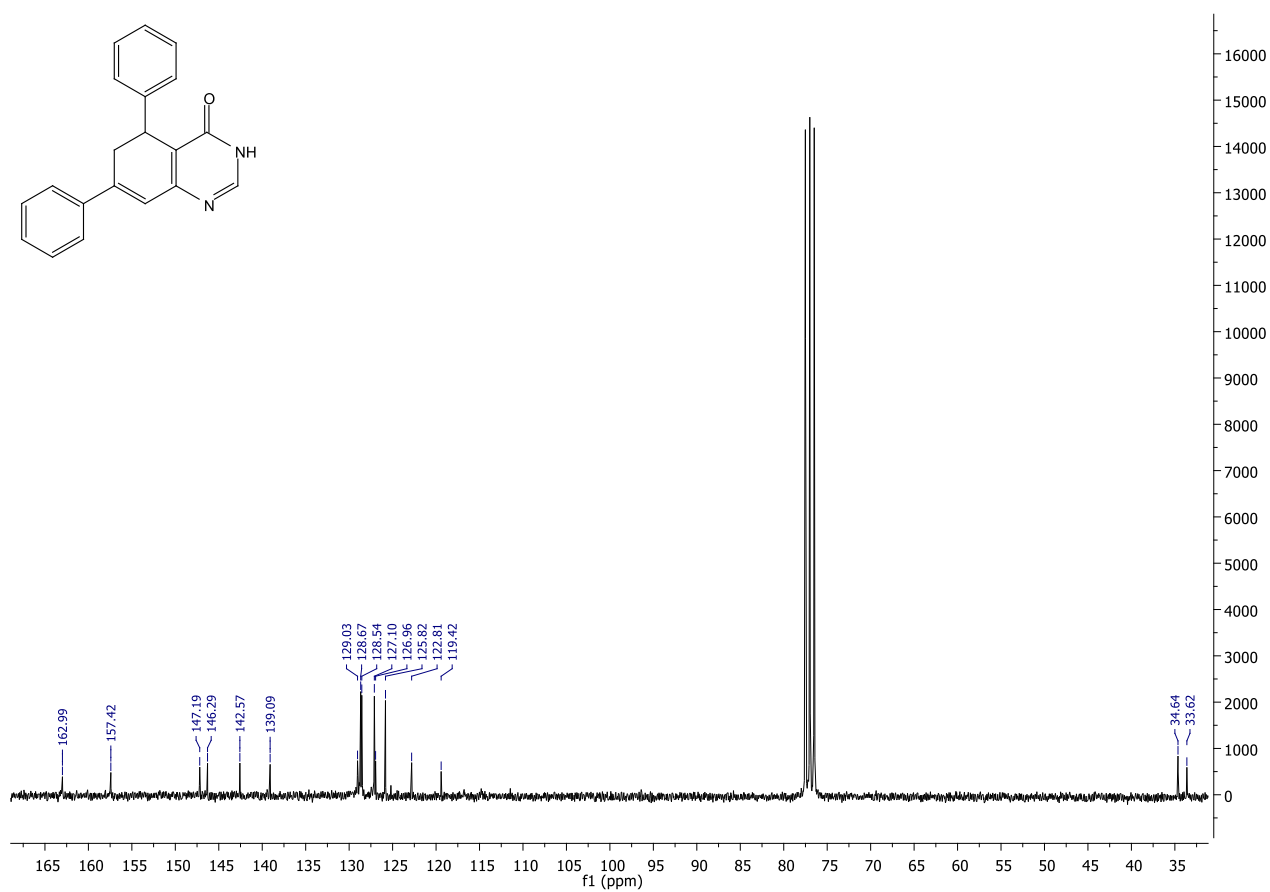

5,7-Bis(4-methoxyphenyl)-5,6-dihydroquinazolin-4(3H)-one **7b**.

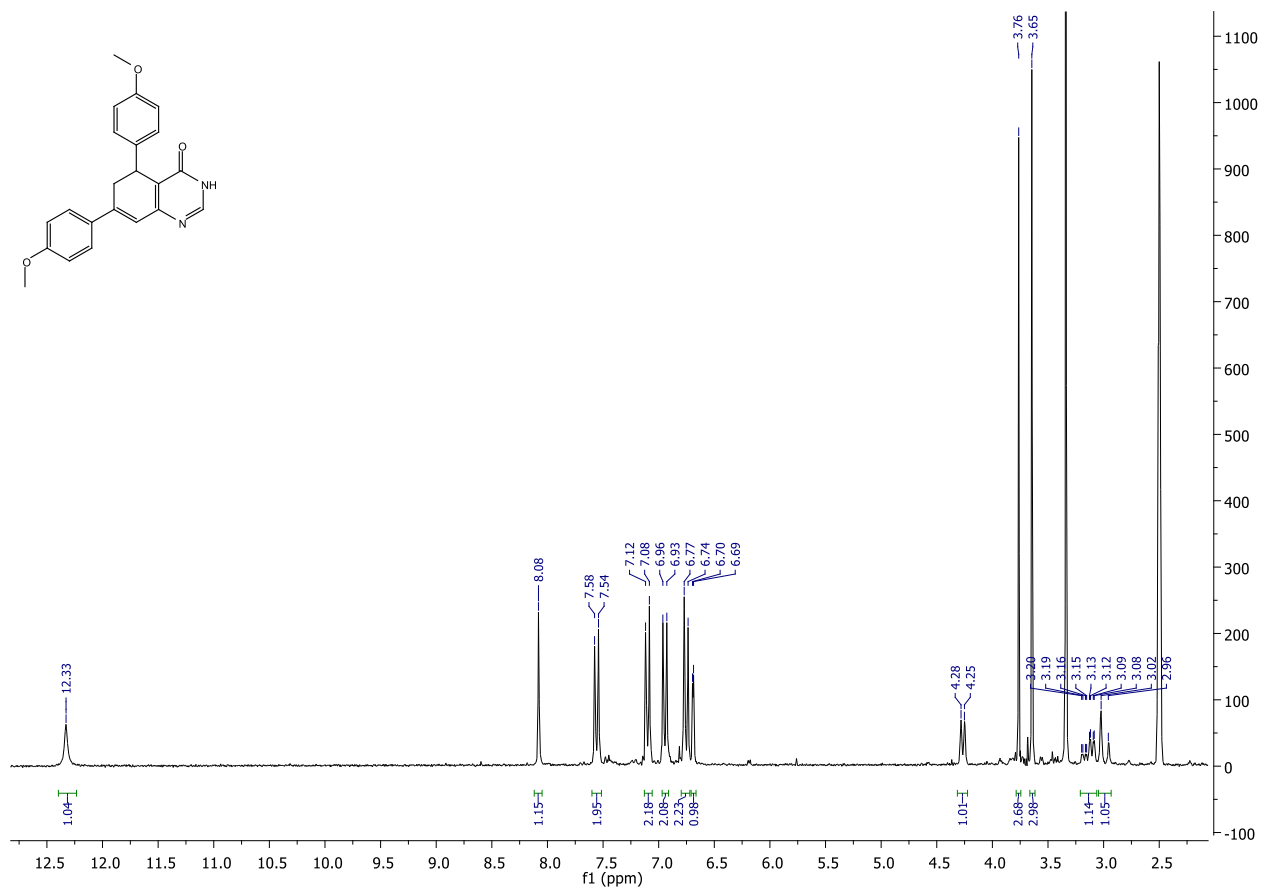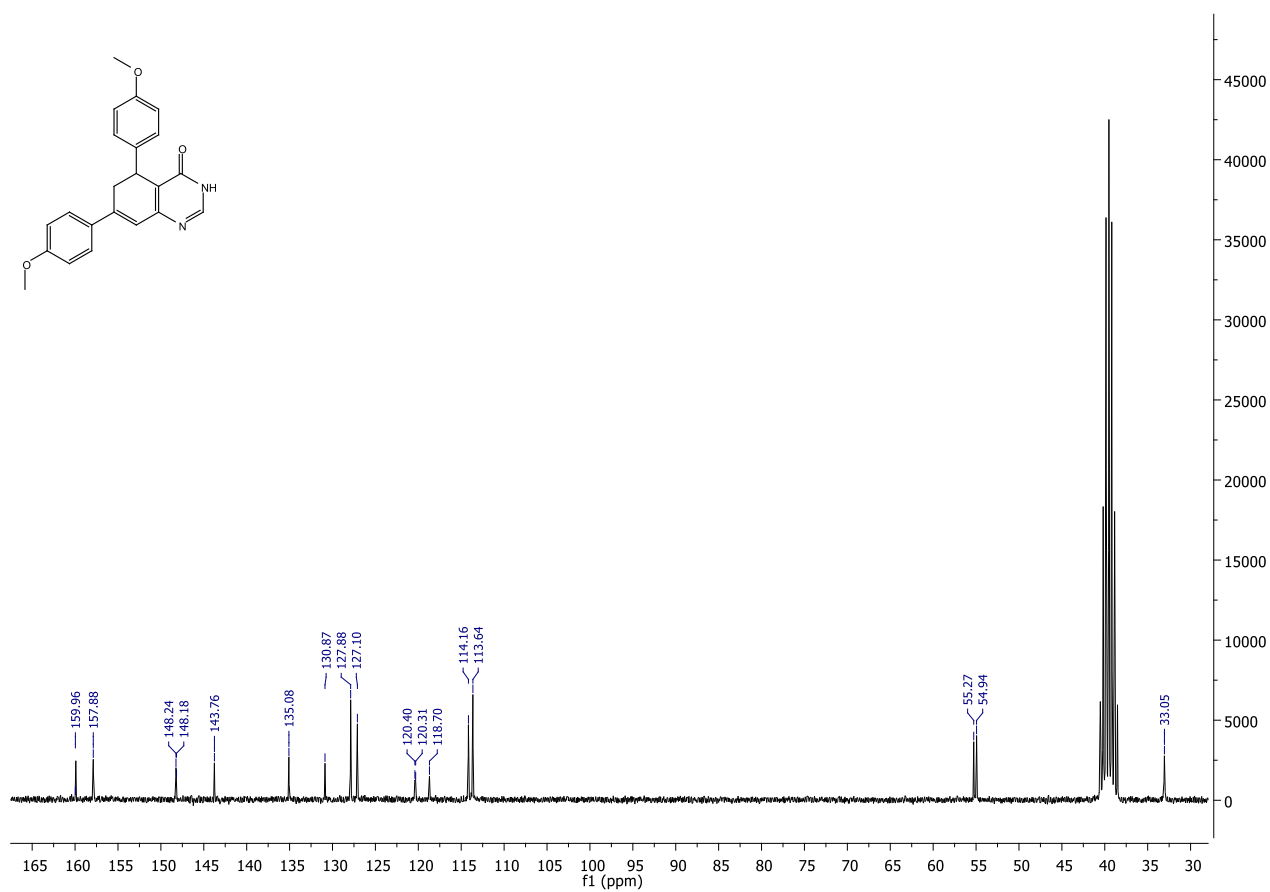

7-(4-Methoxyphenyl)-5-phenyl-5,6-dihydroquinazolin-4(3H)-one **7c** .

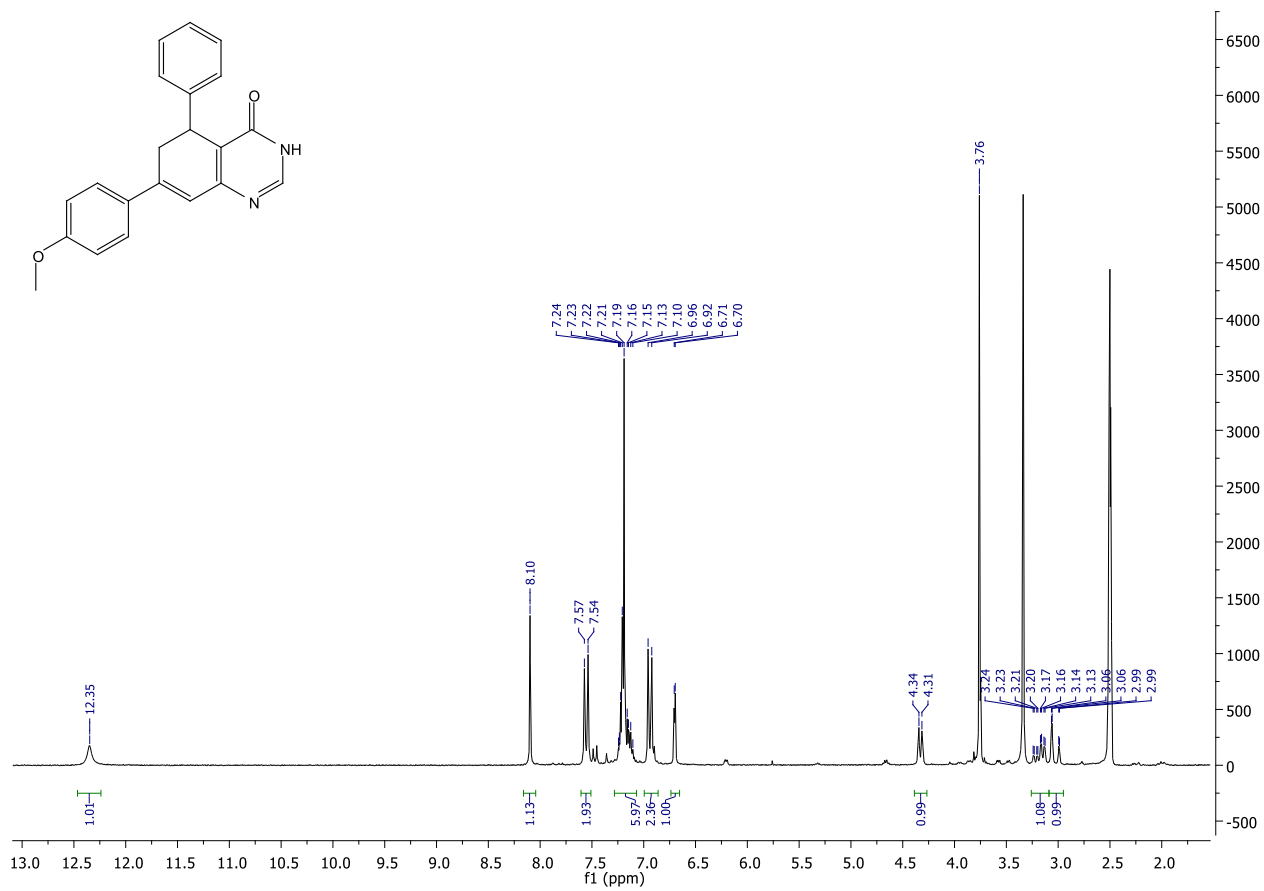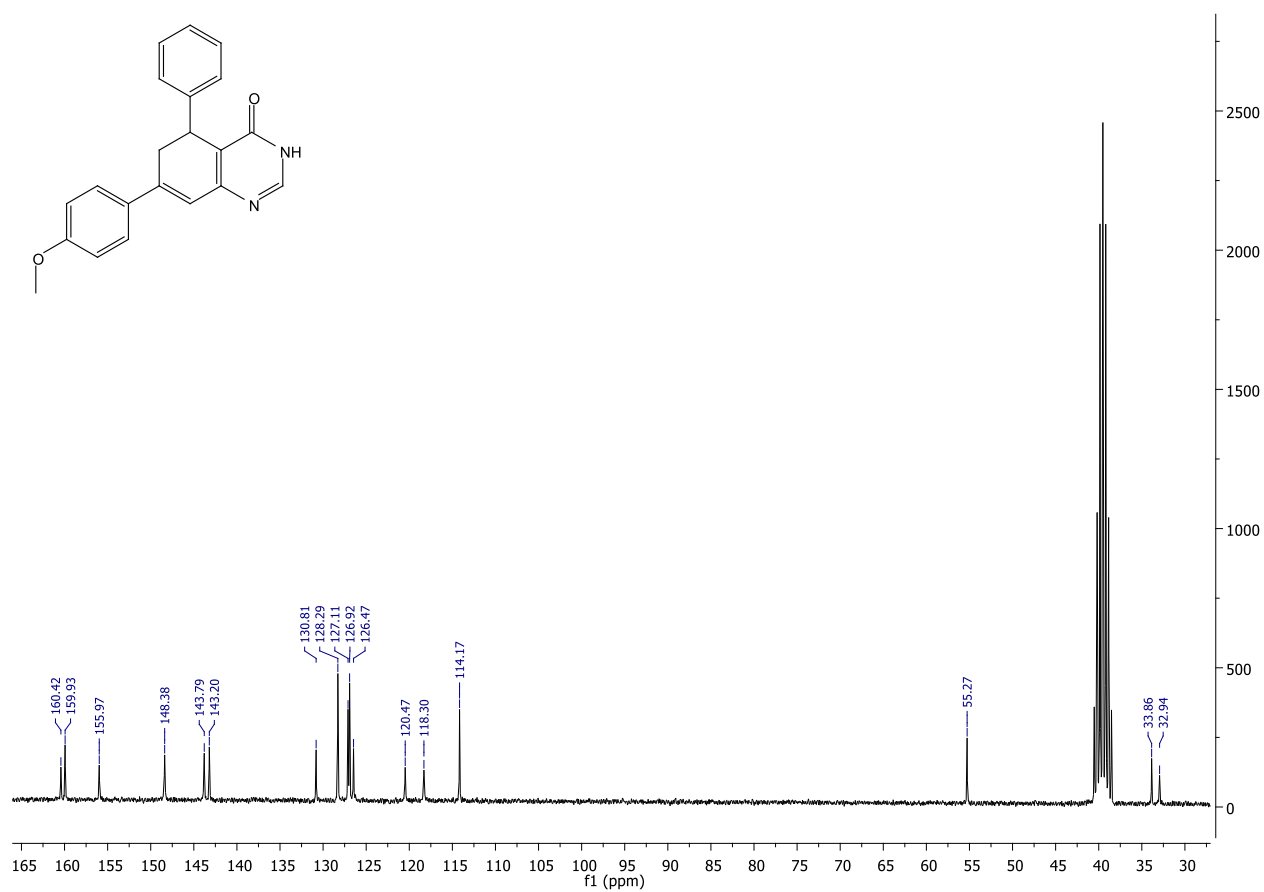

5-(4-Methoxyphenyl)-7-phenyl-5,6-dihydroquinazolin-4(3H)-one **7d** .

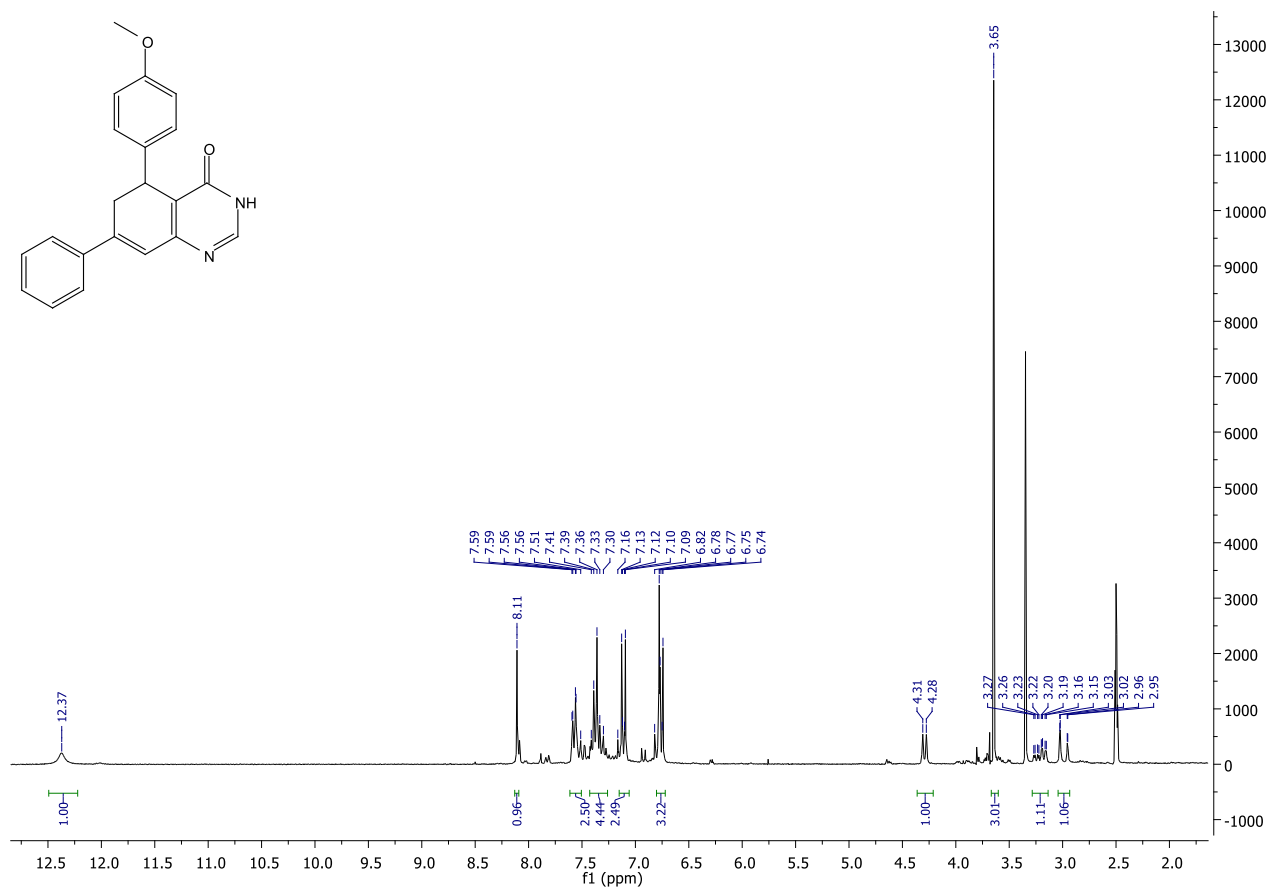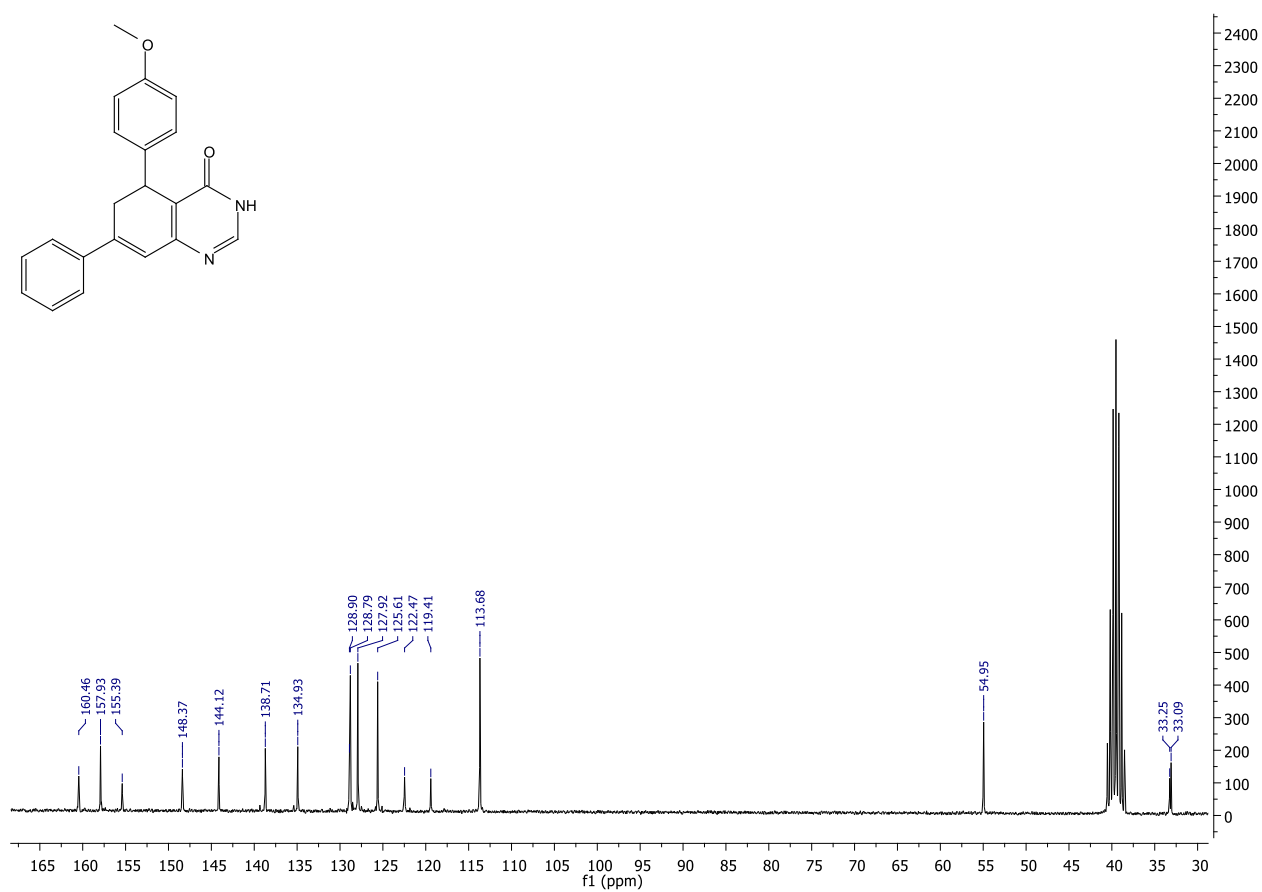

5,7-Bis(4-chlorophenyl)-5,6-dihydroquinazolin-4(3H)-one **7f** .

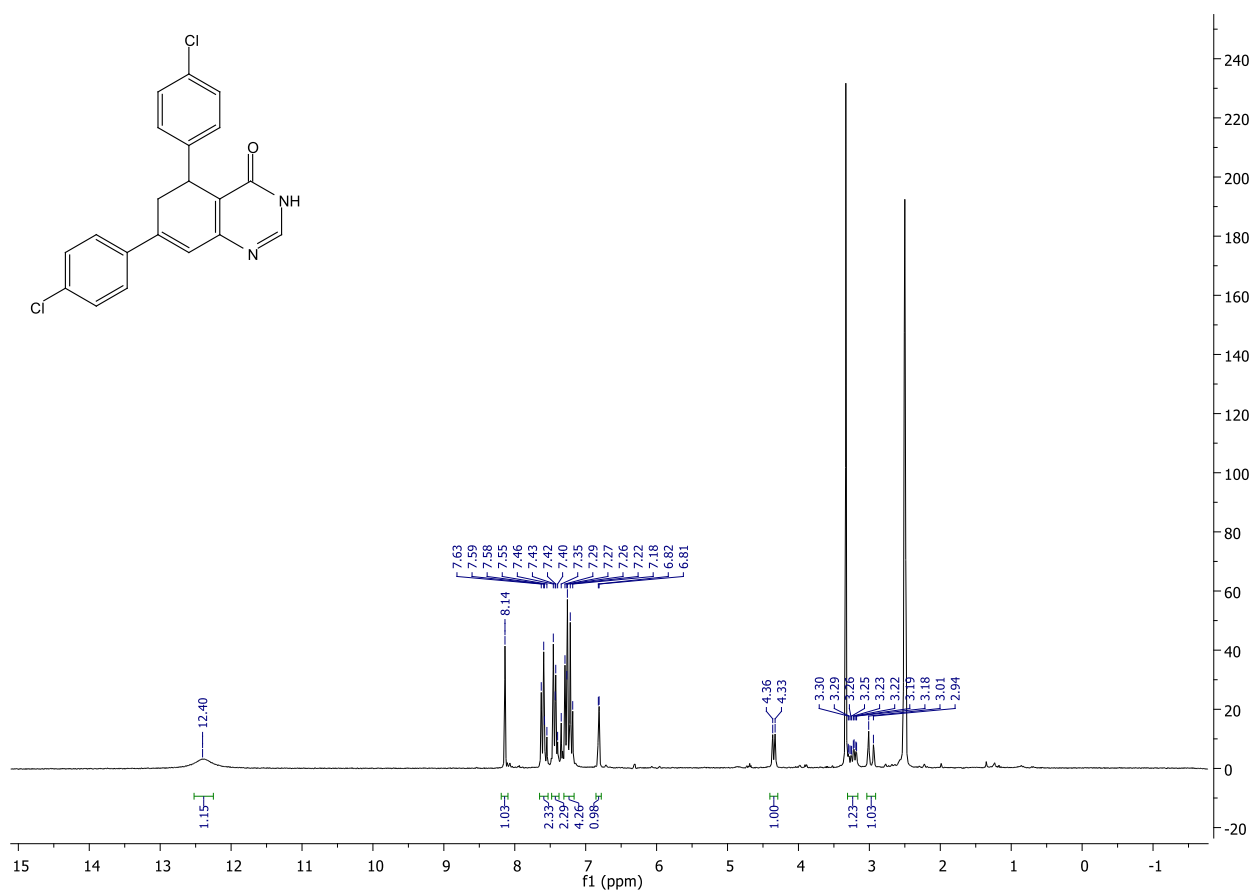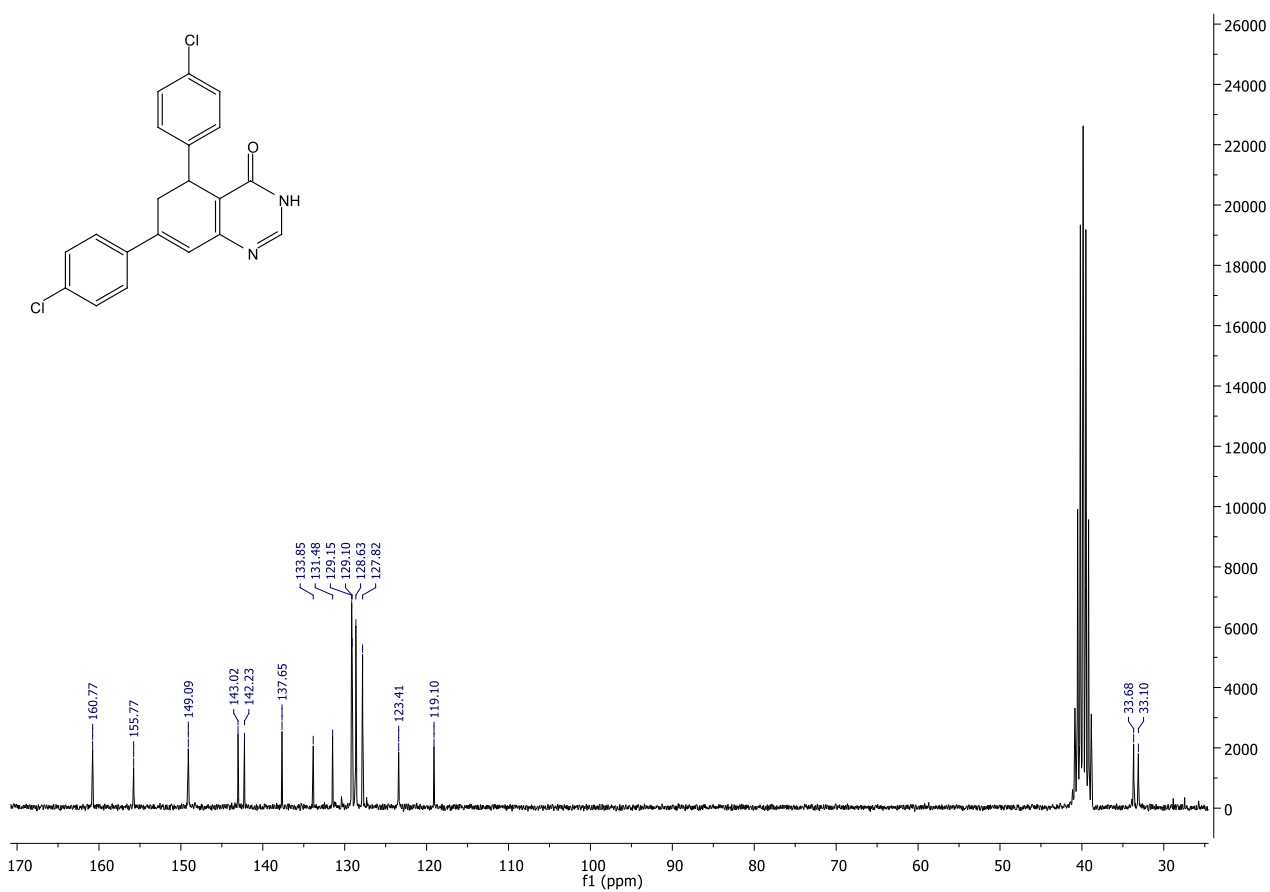



5-(4-Bromophenyl)-7-(4-chlorophenyl)-5,6-dihydroquinazolin-4(3H)-one **7g** .

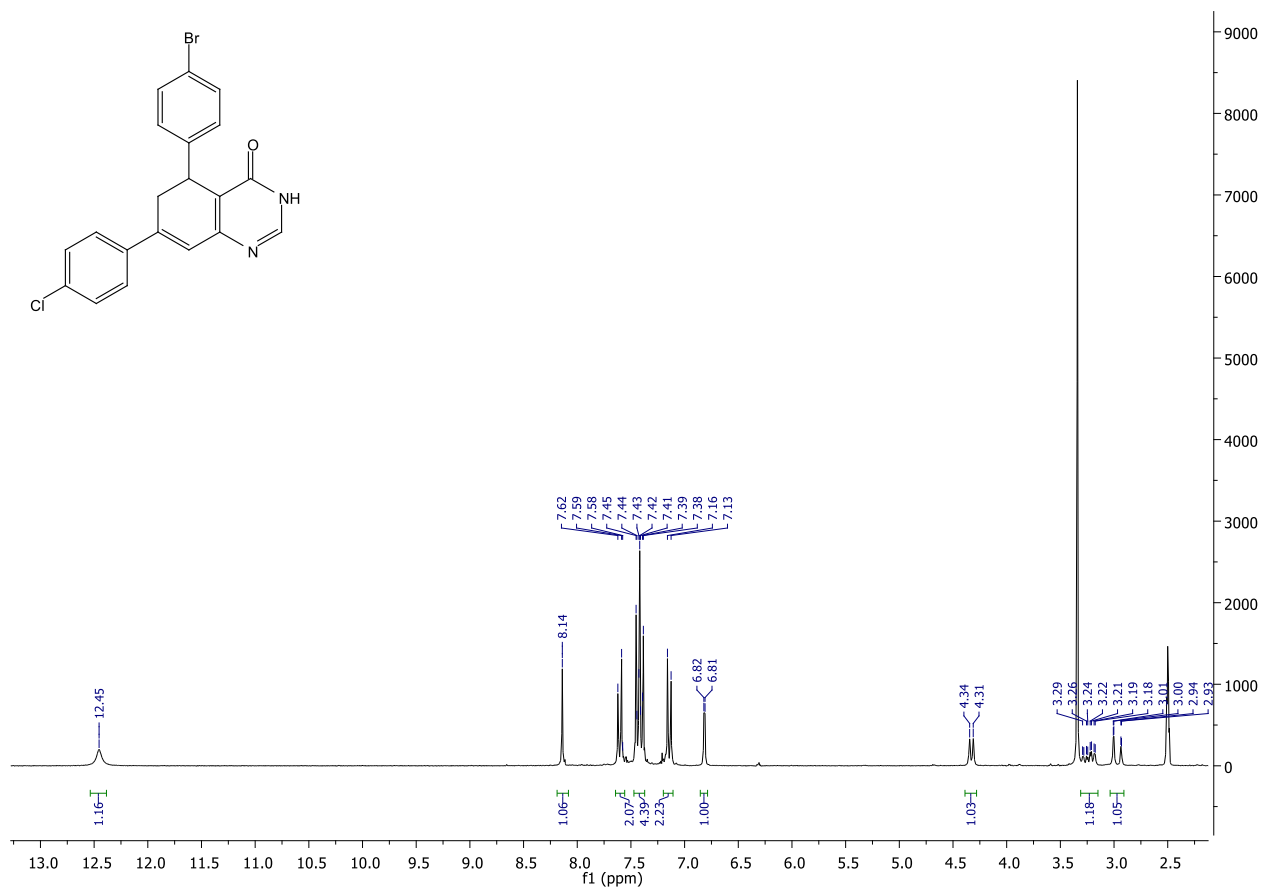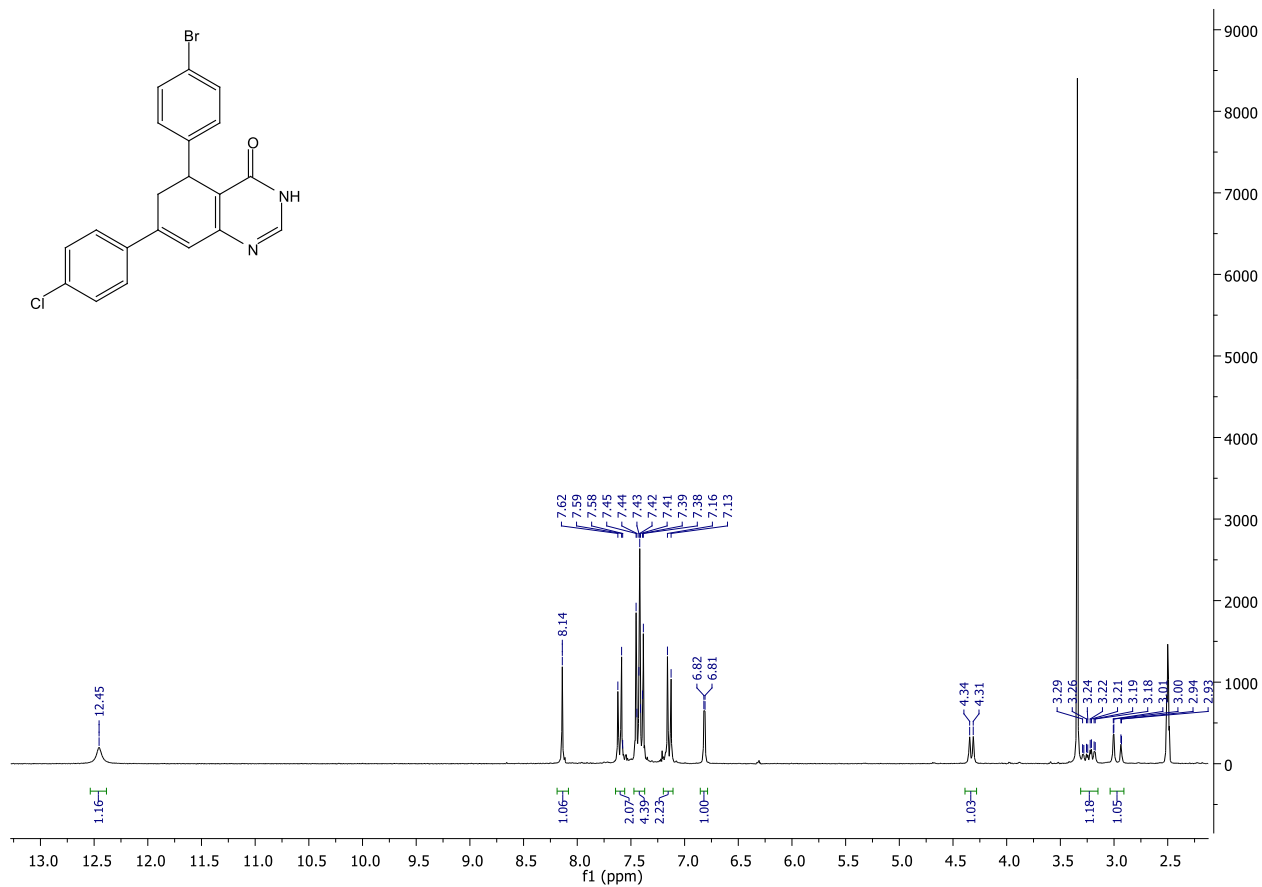

7-(4-Chlorophenyl)-5-phenyl-5,6-dihydroquinazolin-4(3H)-one **7h** .

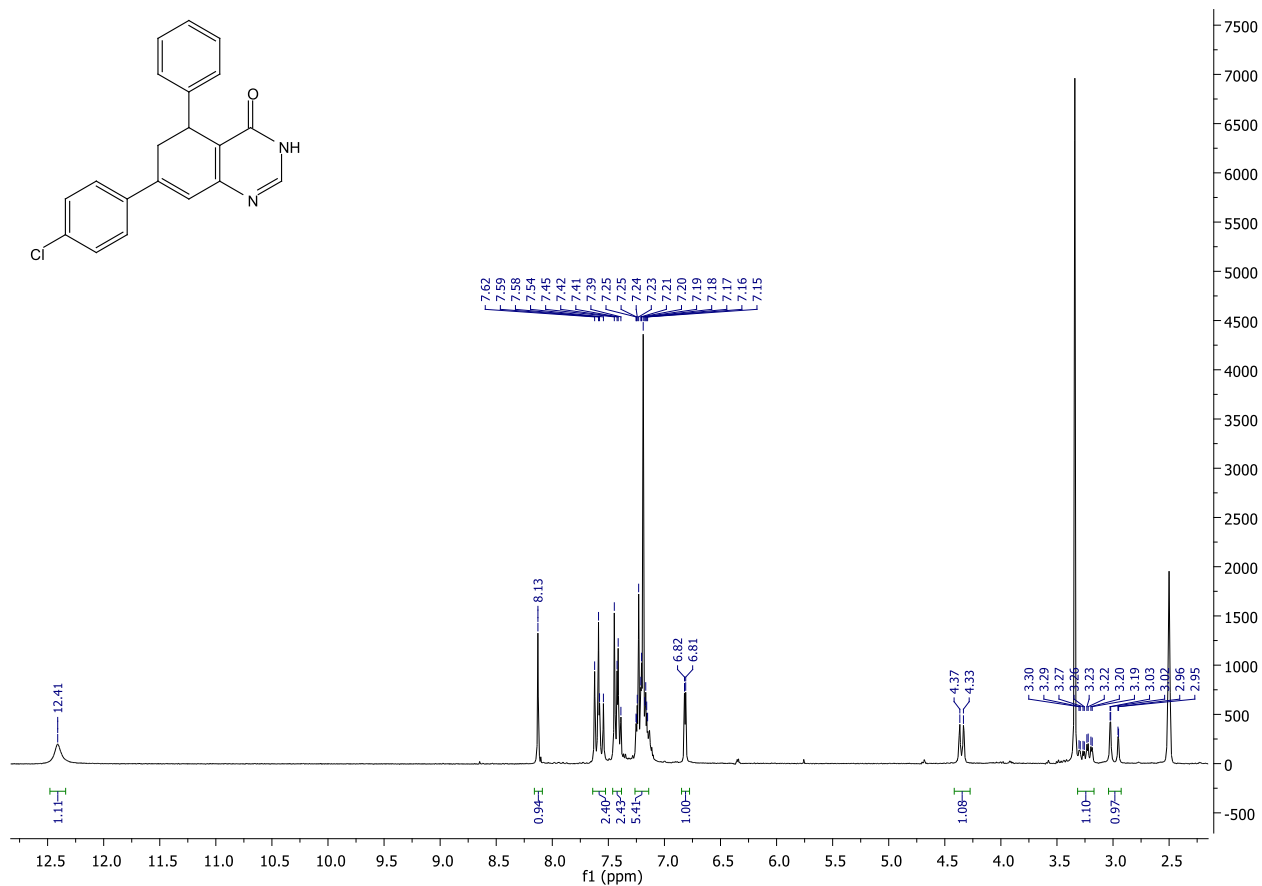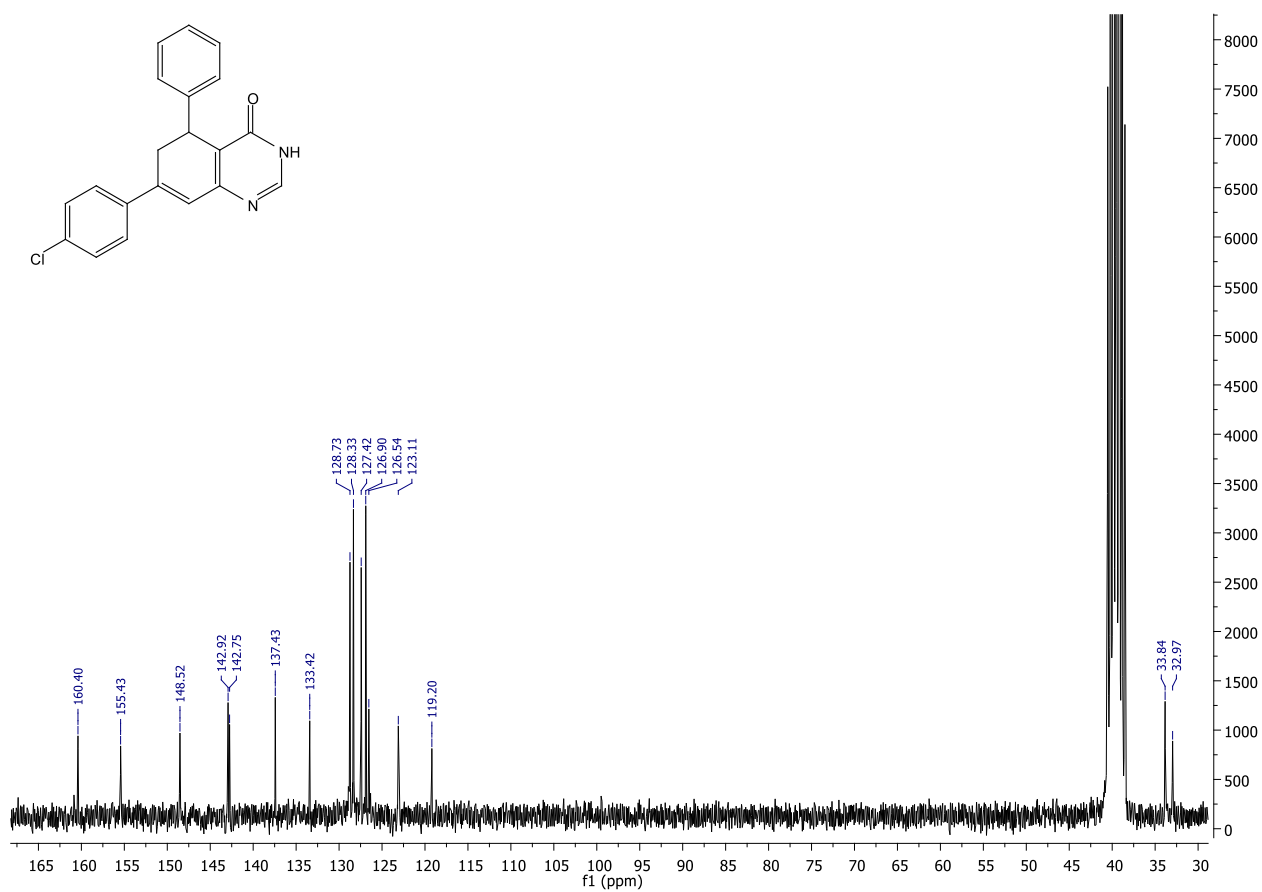

5-(4-Chlorophenyl)-7-phenyl-5,6-dihydroquinazolin-4(3H)-one **7i** .

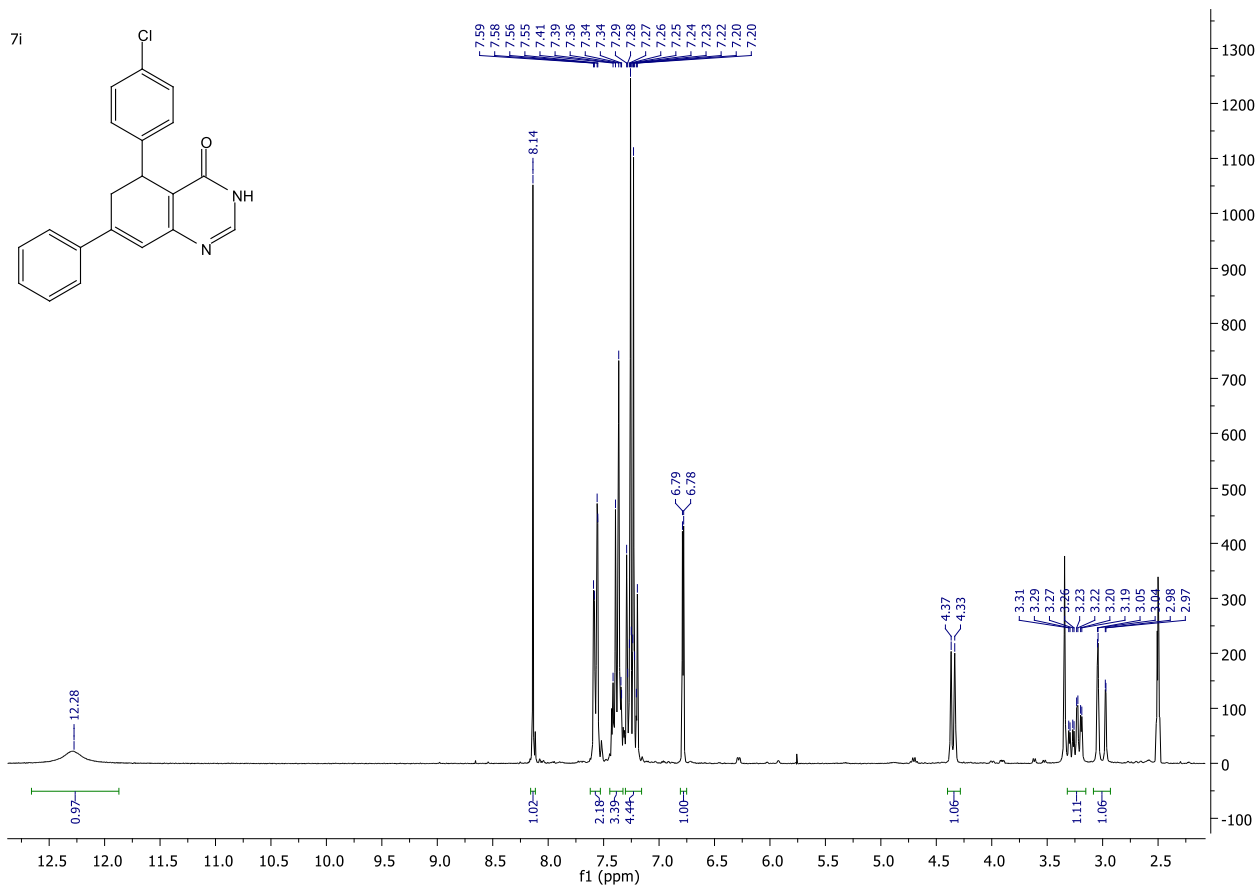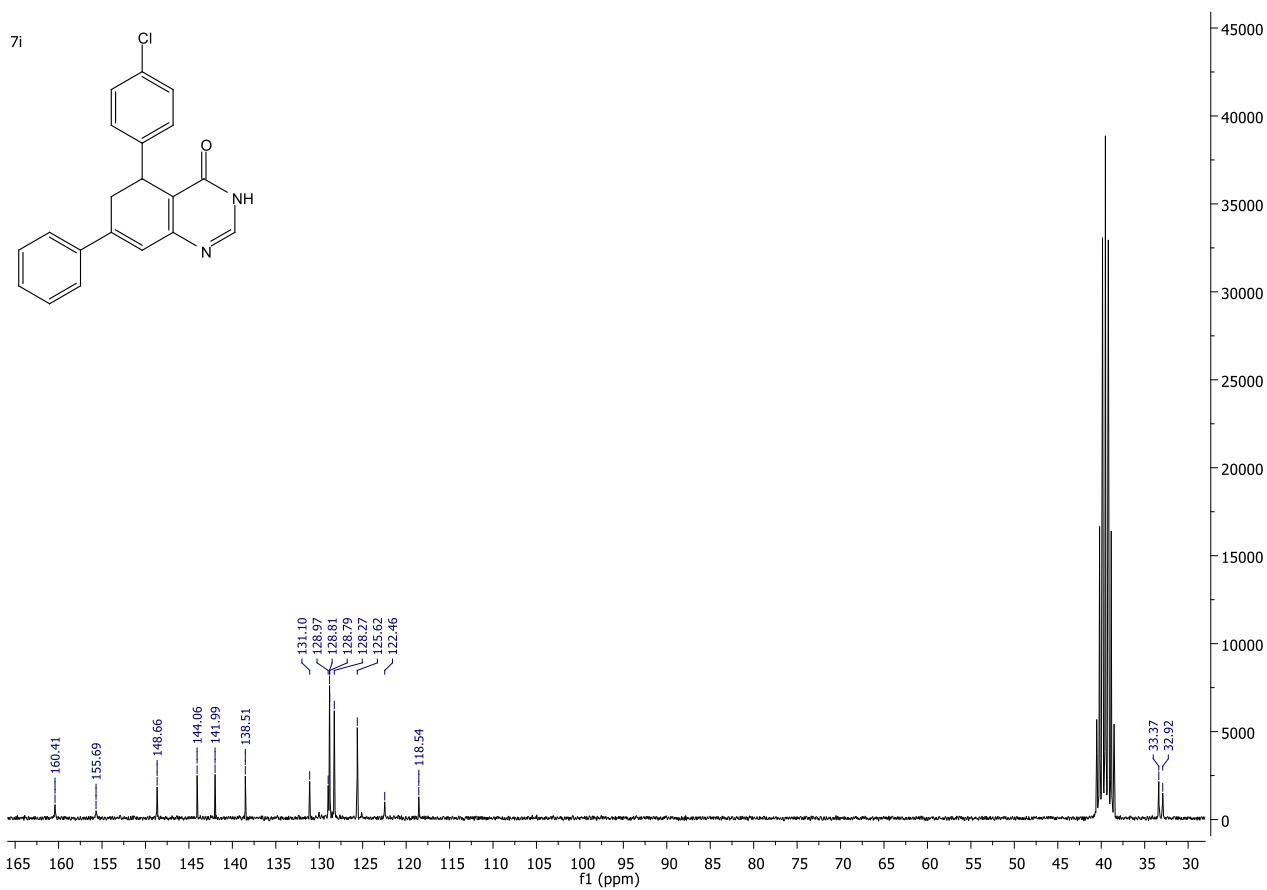

5-(2-Furanyl)-7-phenyl-5,6-dihydroquinazolin-4(3H)-one **7j** .

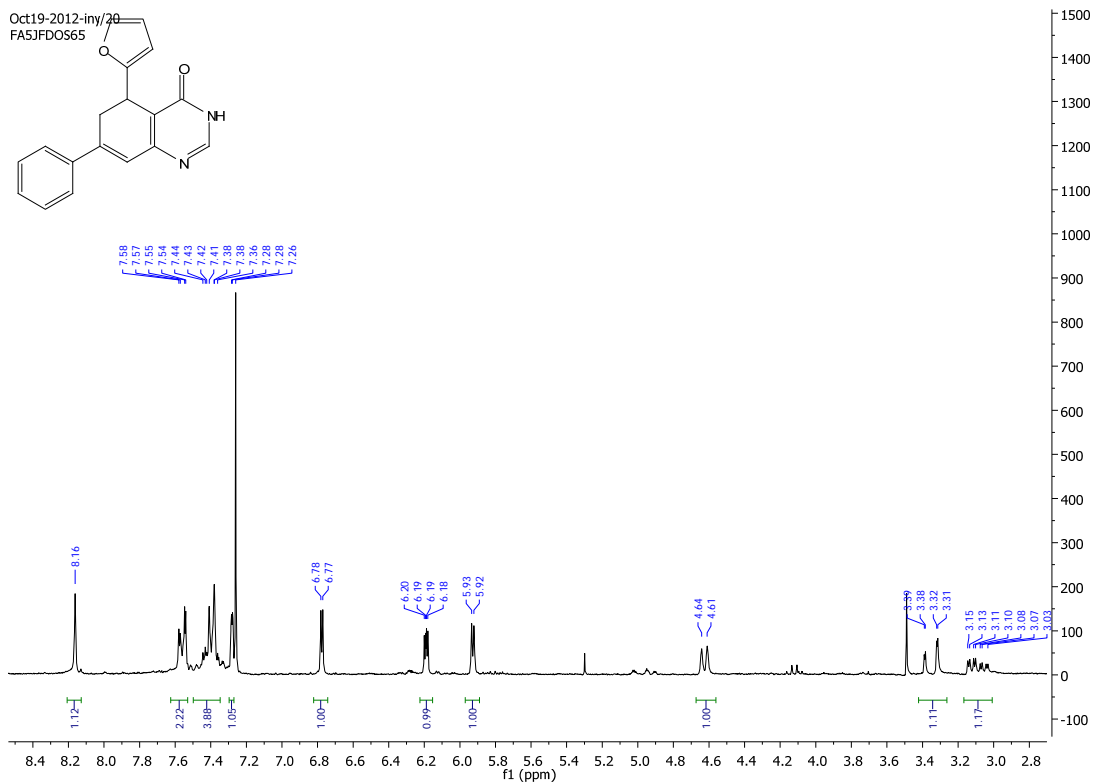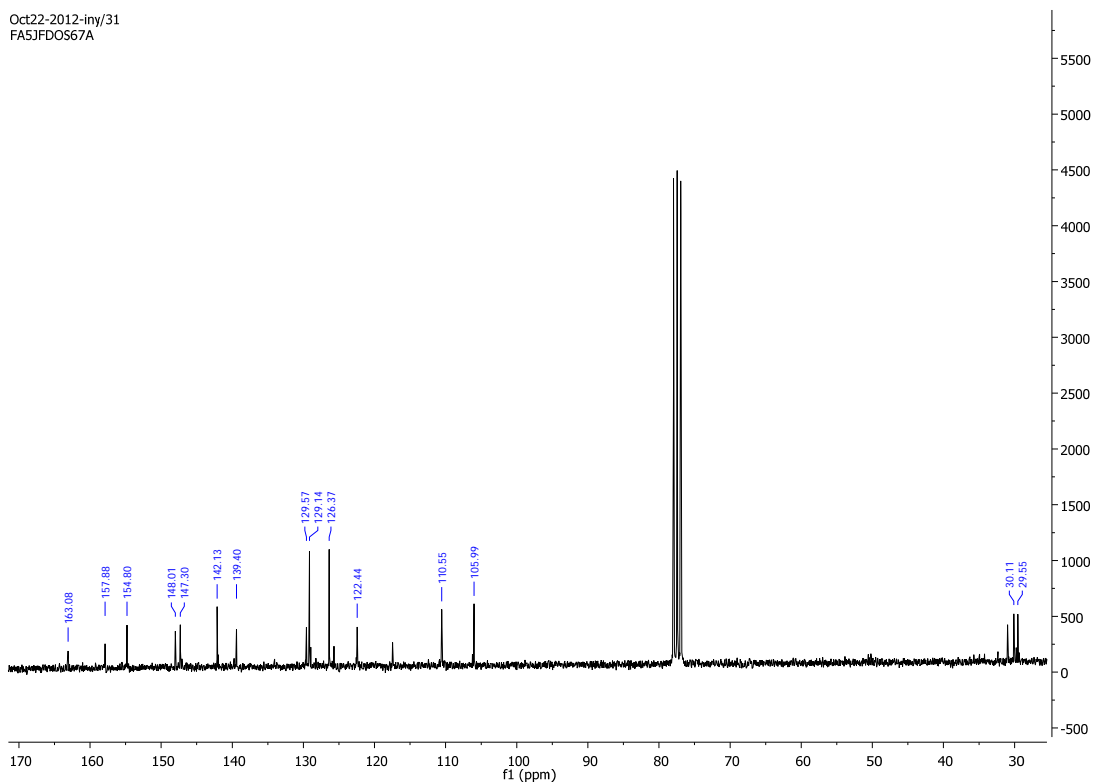

5-(2-phenyl)-7-Furanyl-5,6-dihydroquinazolin-4(3H)-one **7K**.

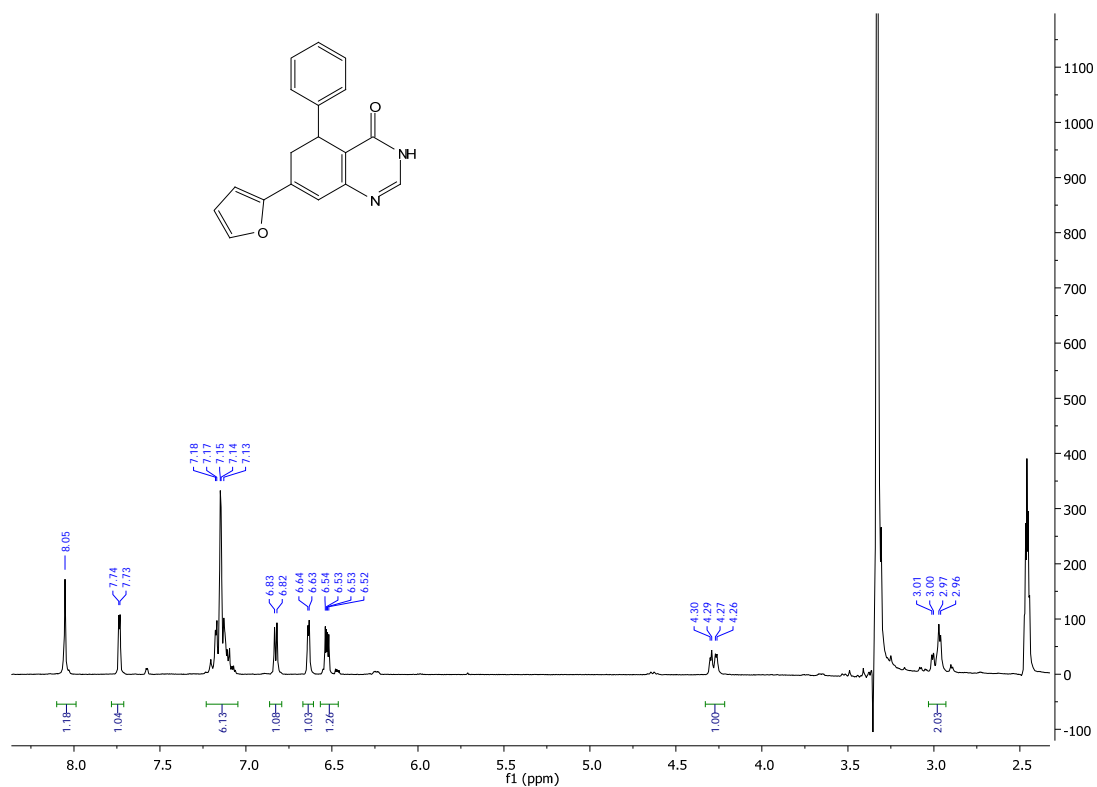

Nov08-2012-iny/51  
FA5JFDO570

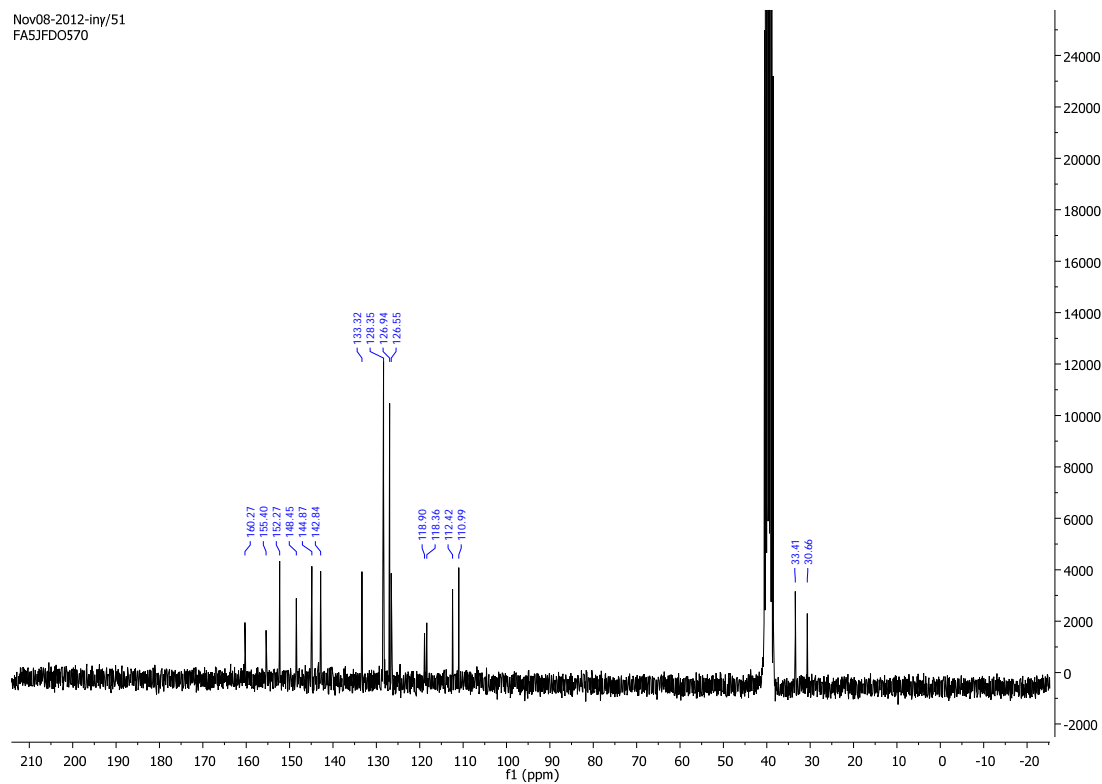

5,7-di-(2-Furanyl)-5,6-dihydroquinazolin-4(3H)-one **71**.

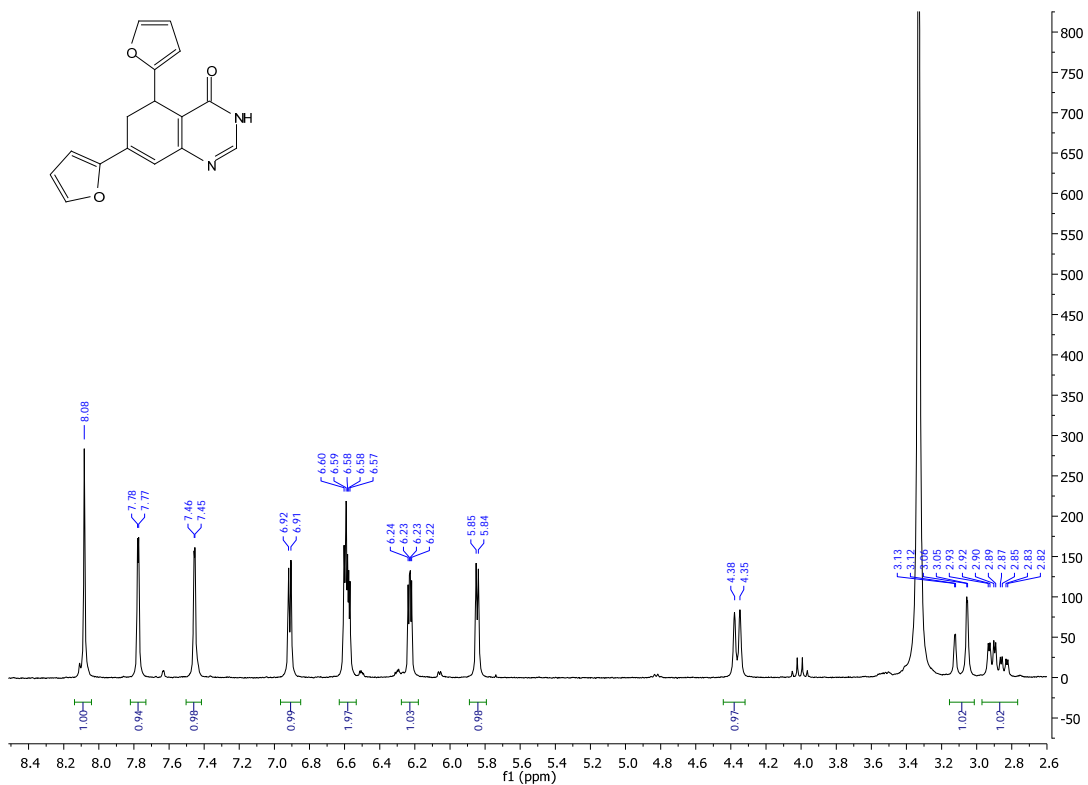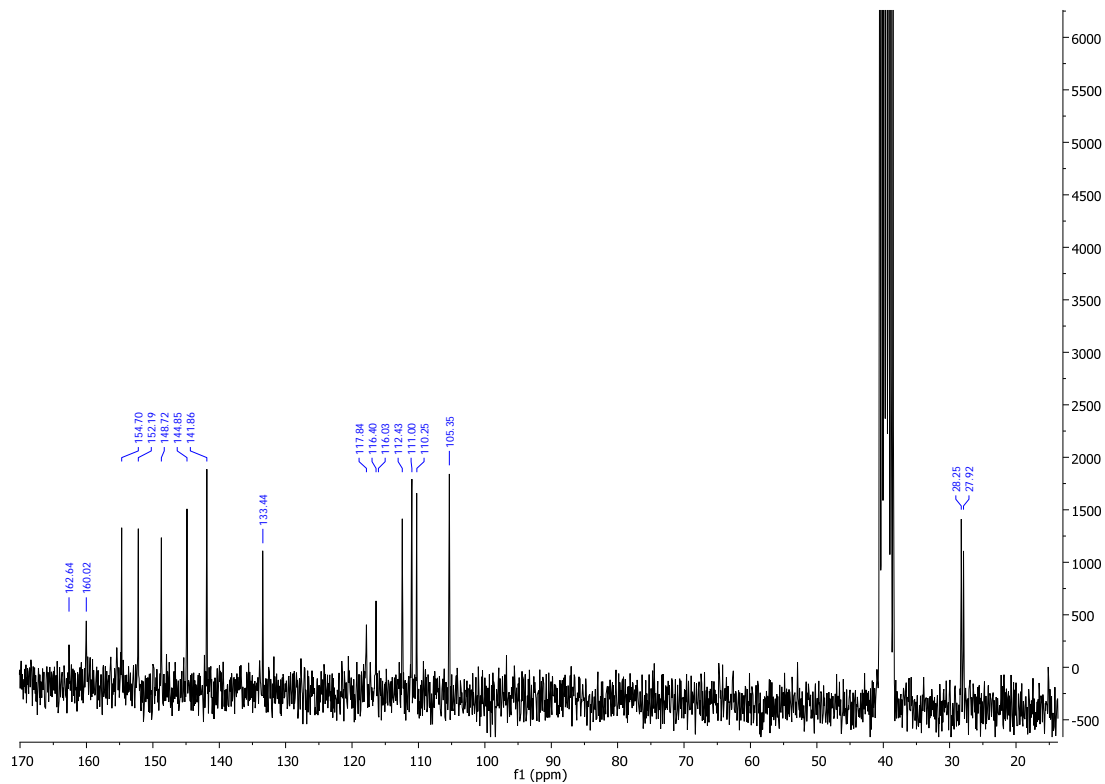

5-(2-Thienyl)-7-phenyl-5,6-dihydroquinazolin-4(3H)-one 7m.

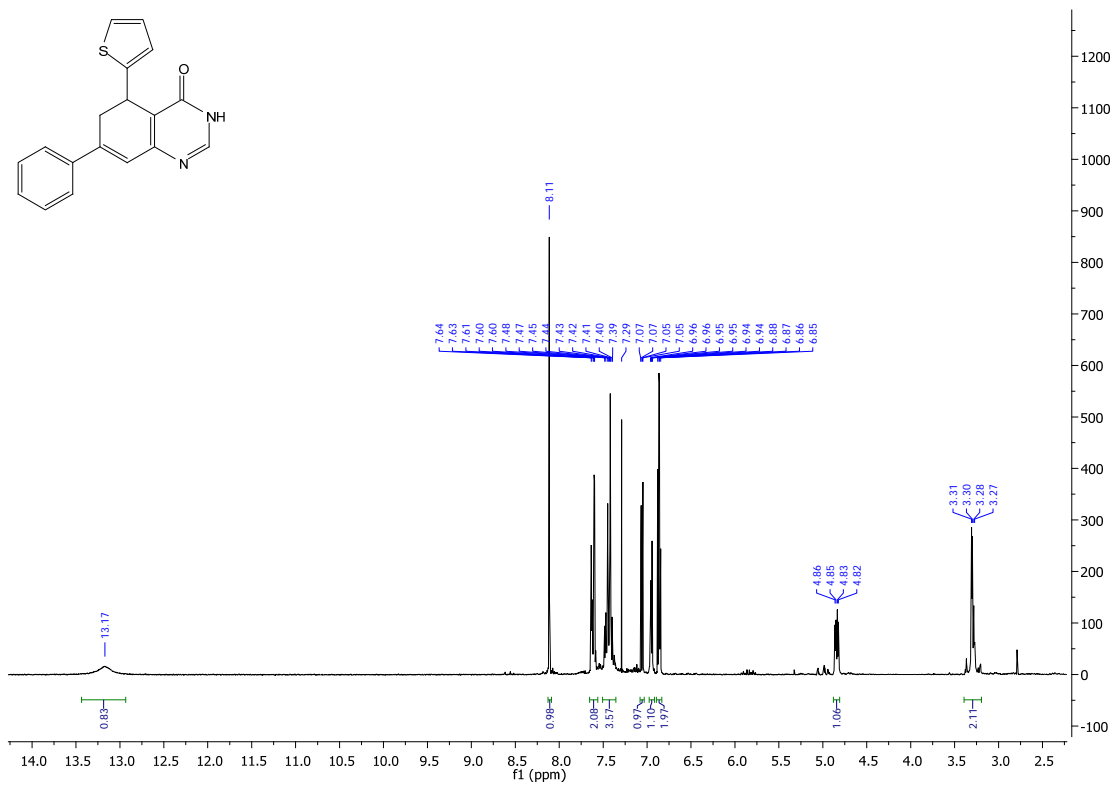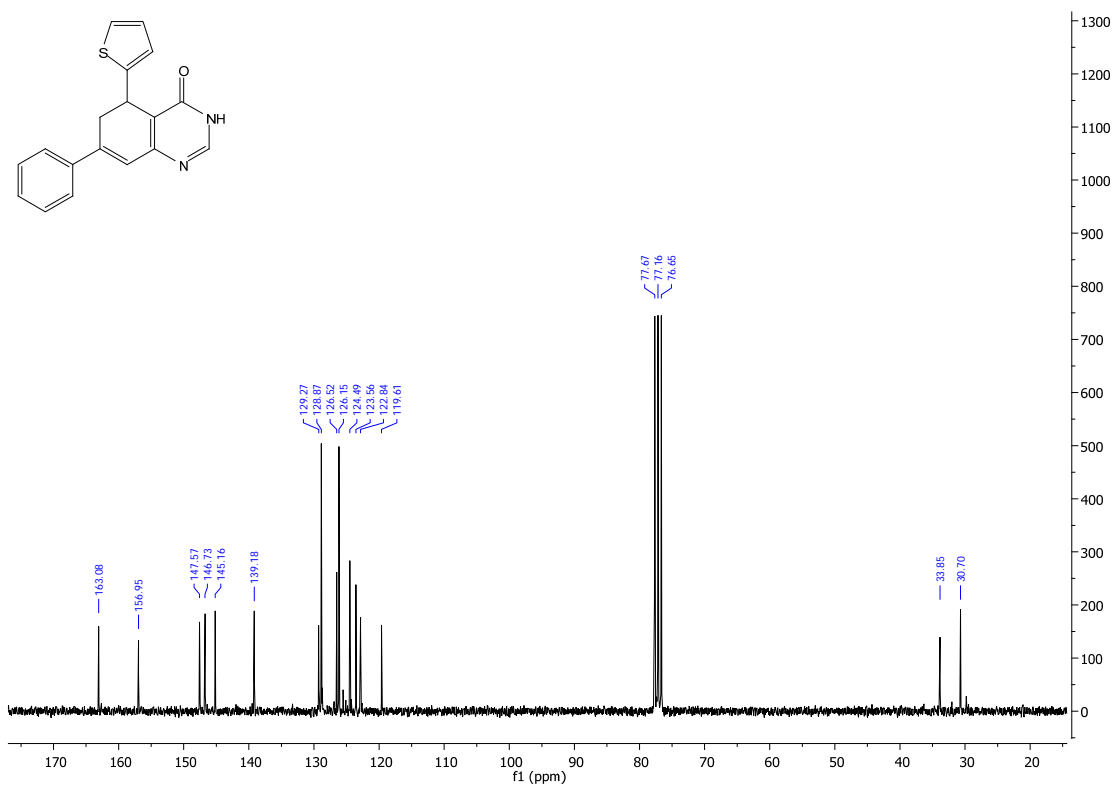

5-(2-phenyl)-7-Thienyl -5,6-dihydroquinazolin-4(3H)-one 7n.

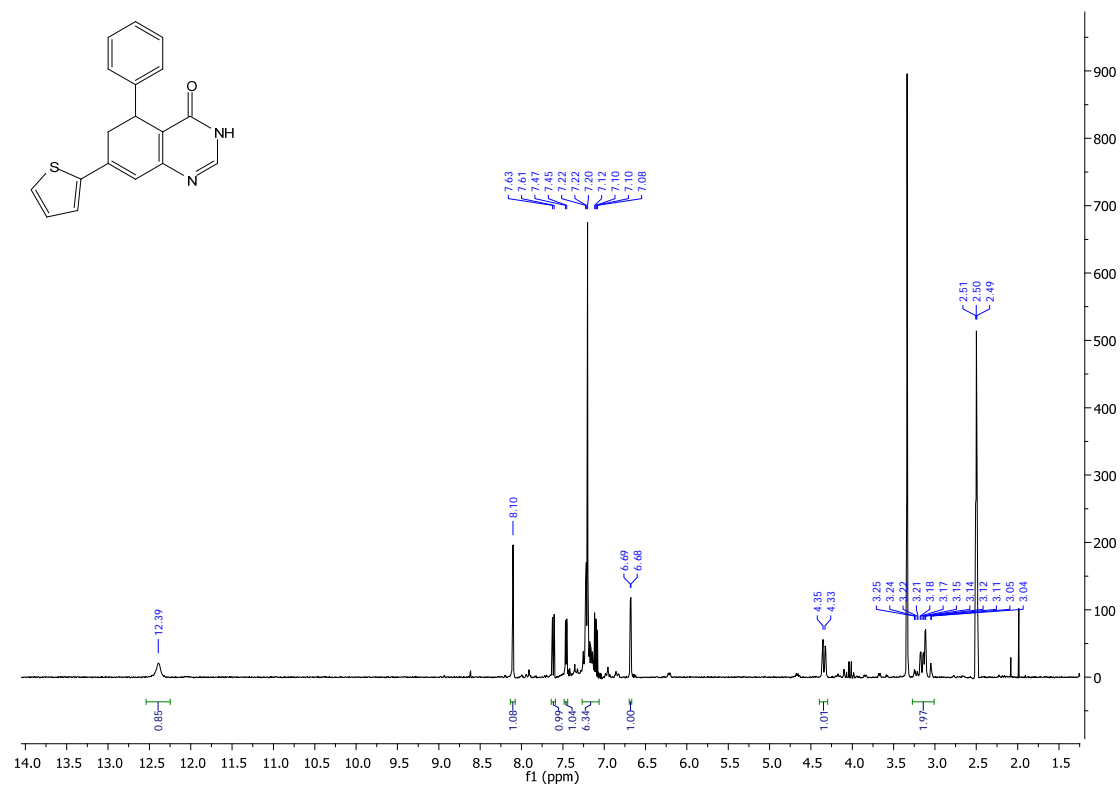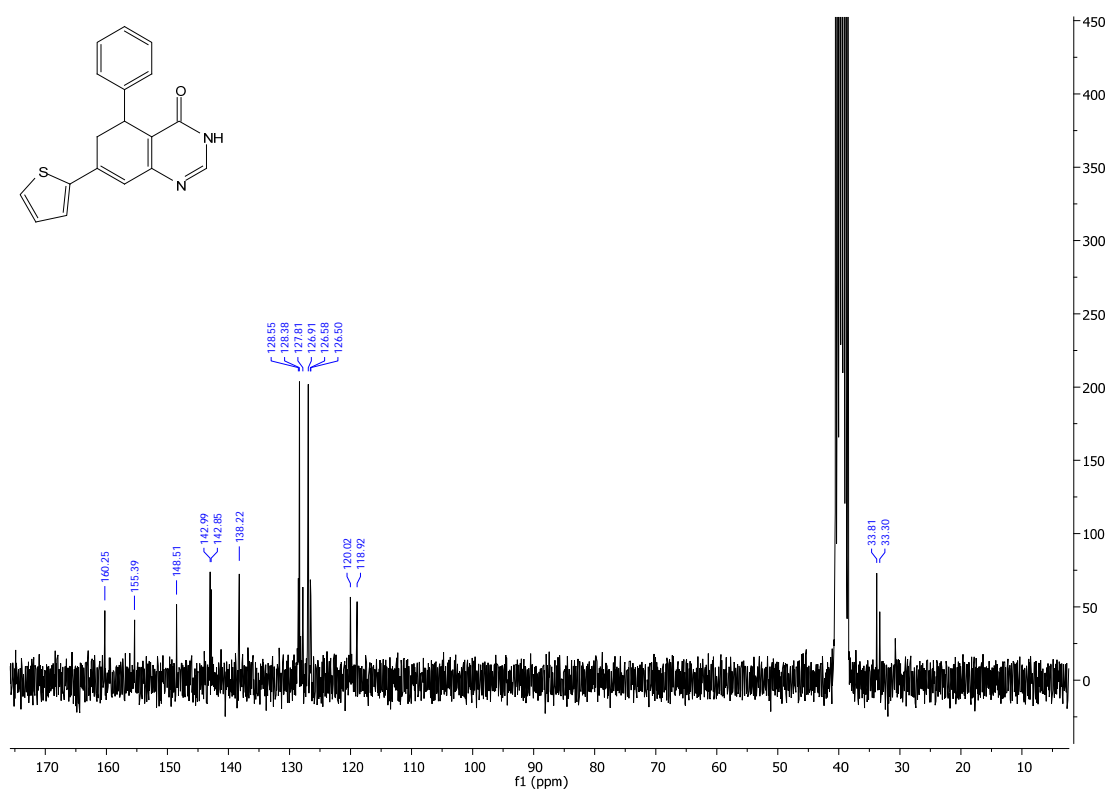



5,7-di-(2-Thienyl)-5,6-dihydroquinazolin-4(3H)-one 7o.

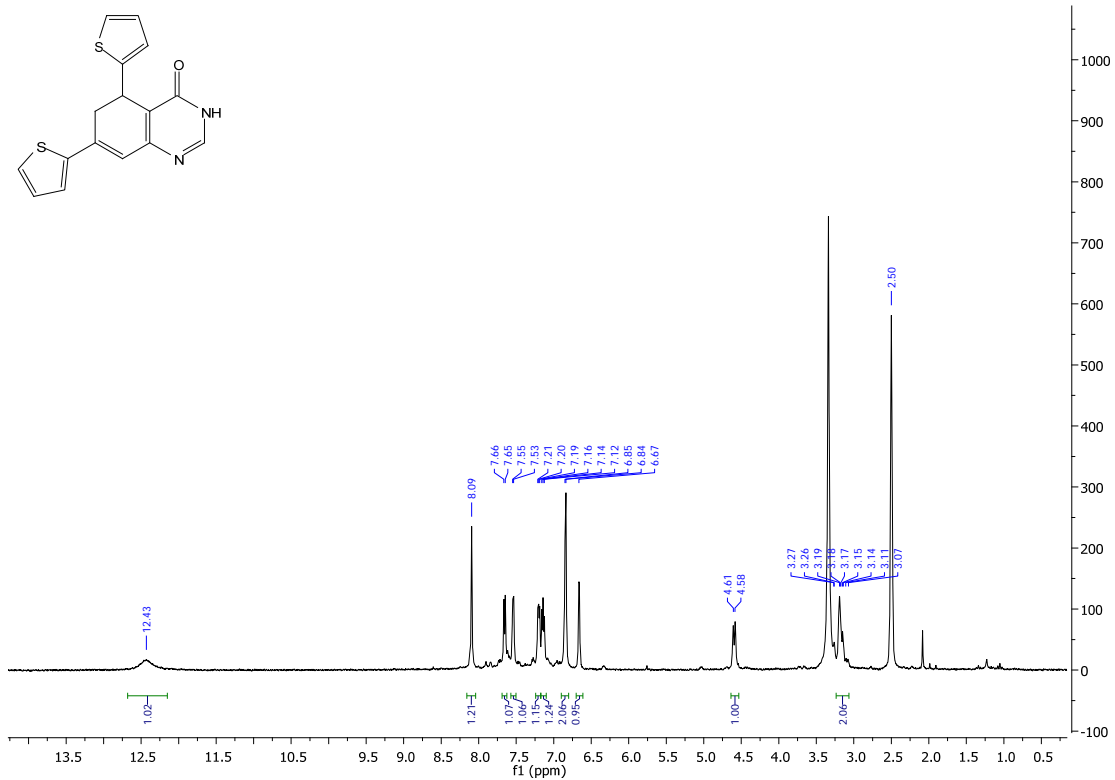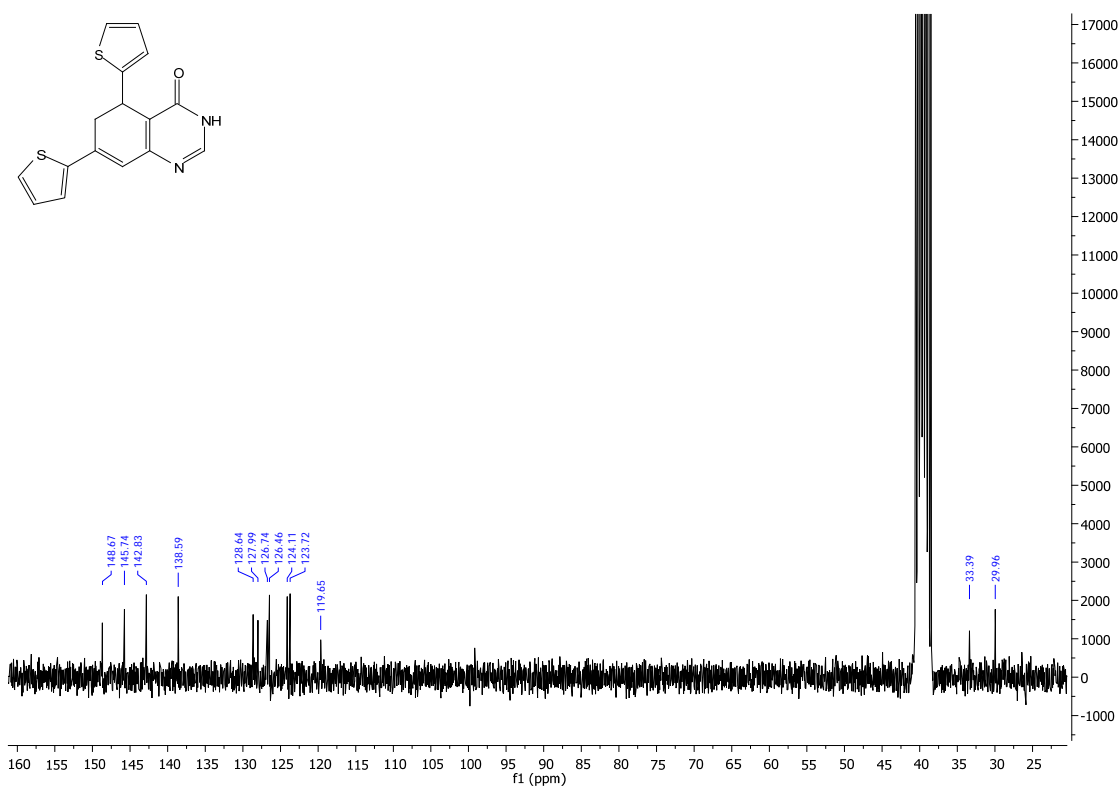

5,7-Diphenyl-5,6-quinazolin-4(3H)-one **8a**

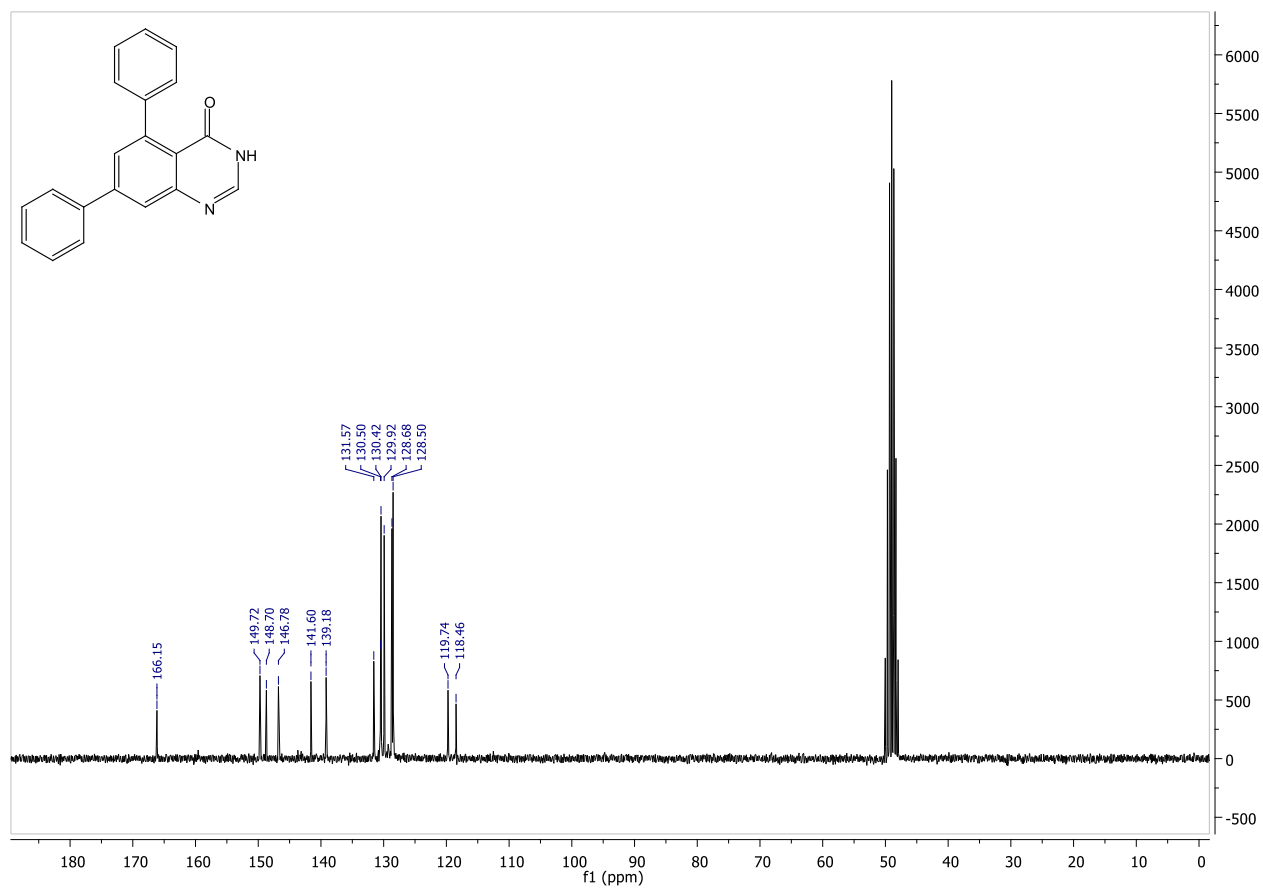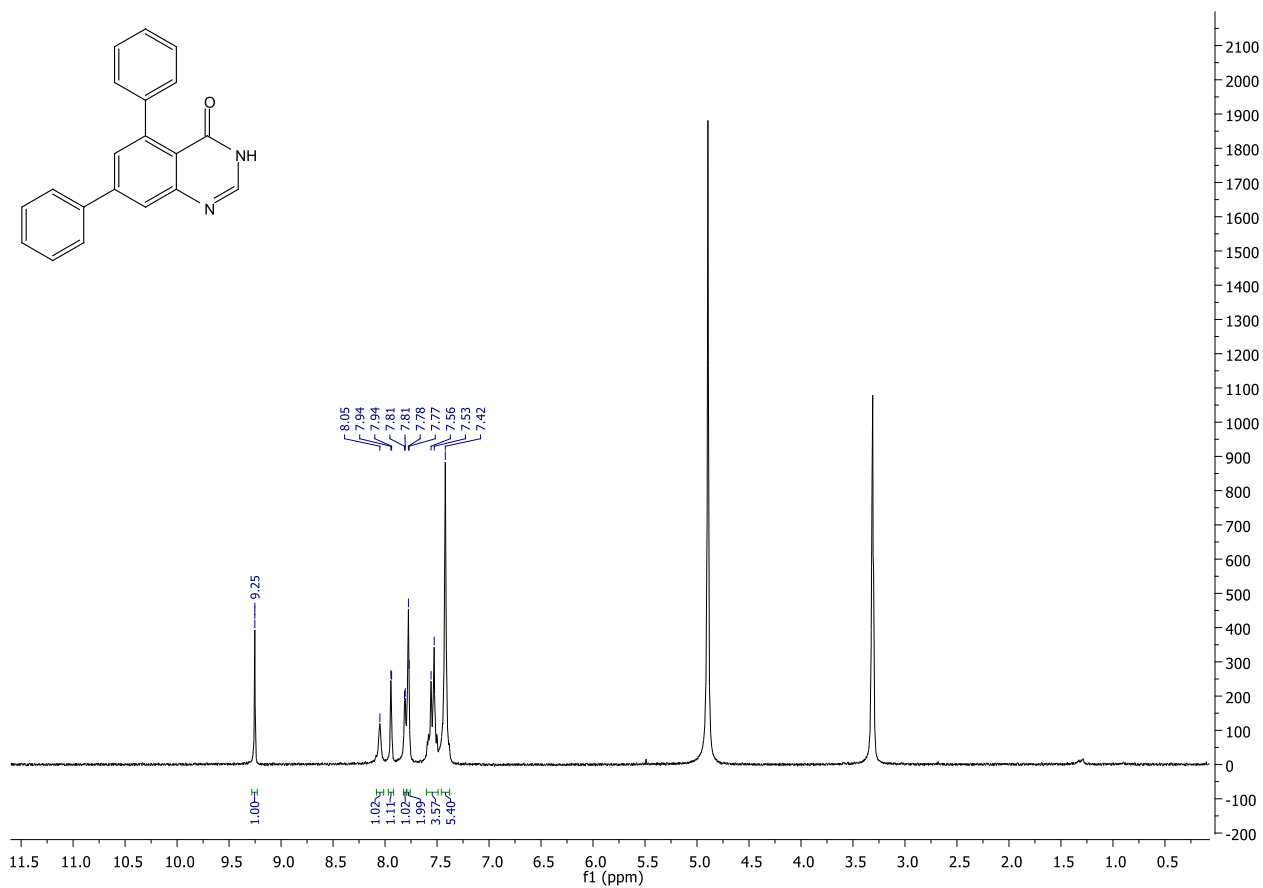

5,7-Bis(4-methoxyphenyl)quinazolin-4(3H)-one **8b**

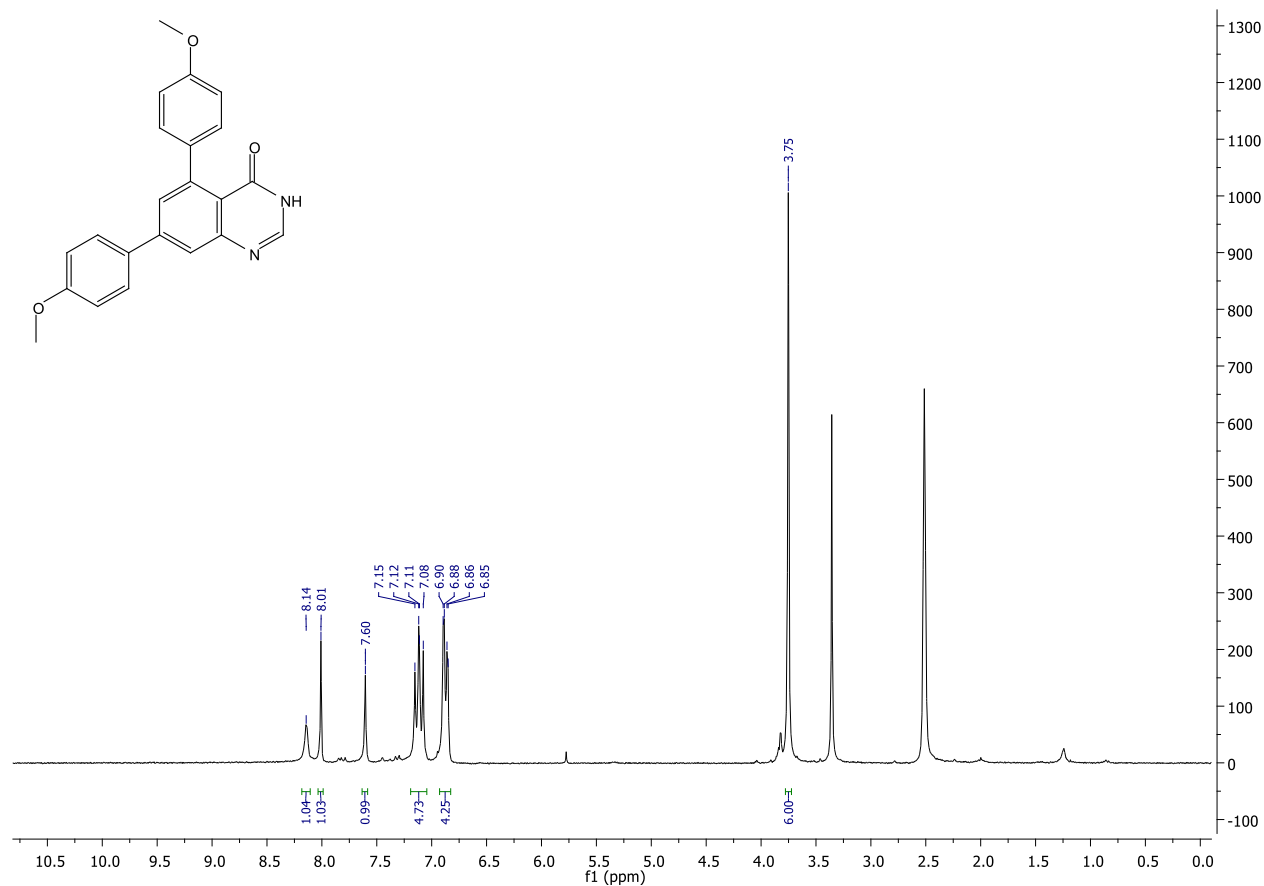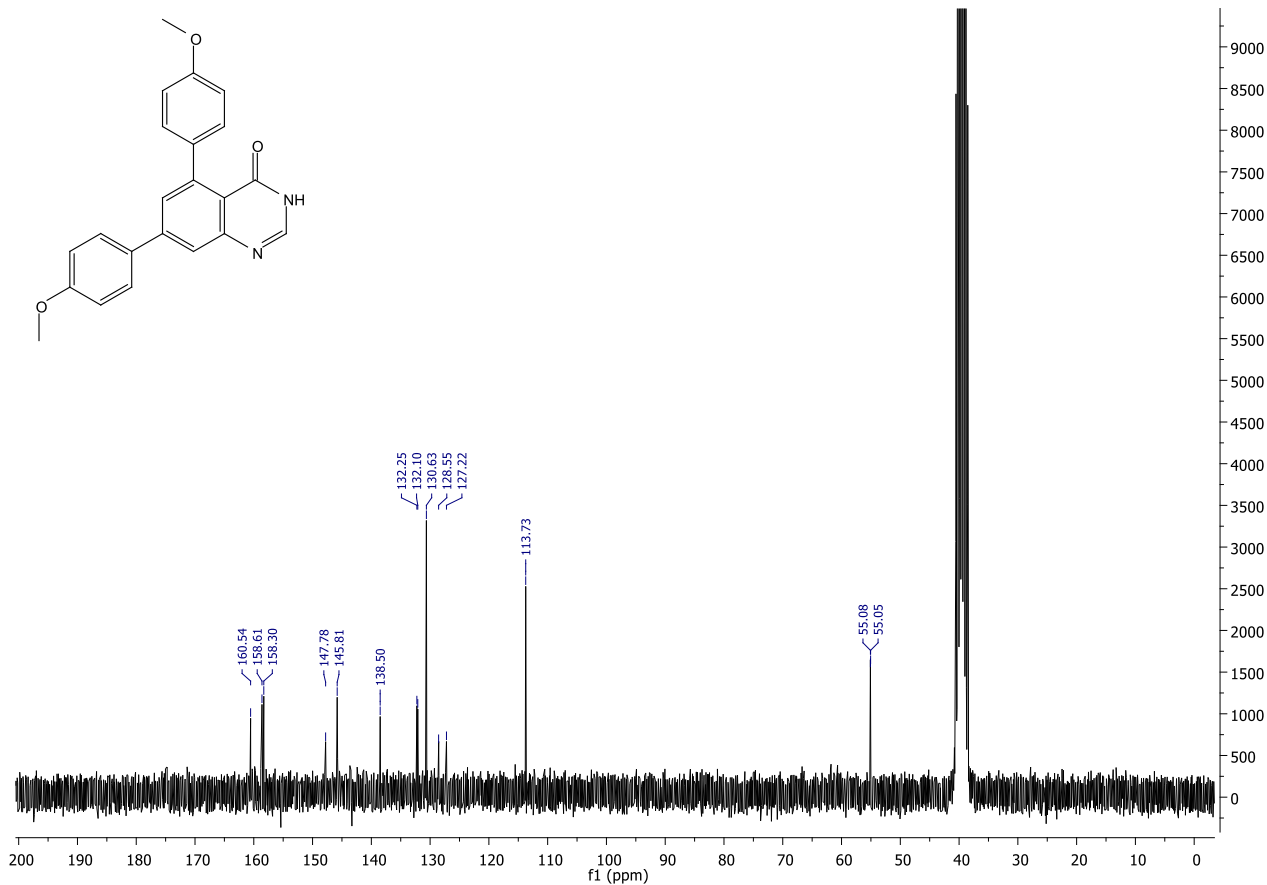

7-(4-Methoxyphenyl)-5-phenylquinazolin-4(3H)-one **8c**

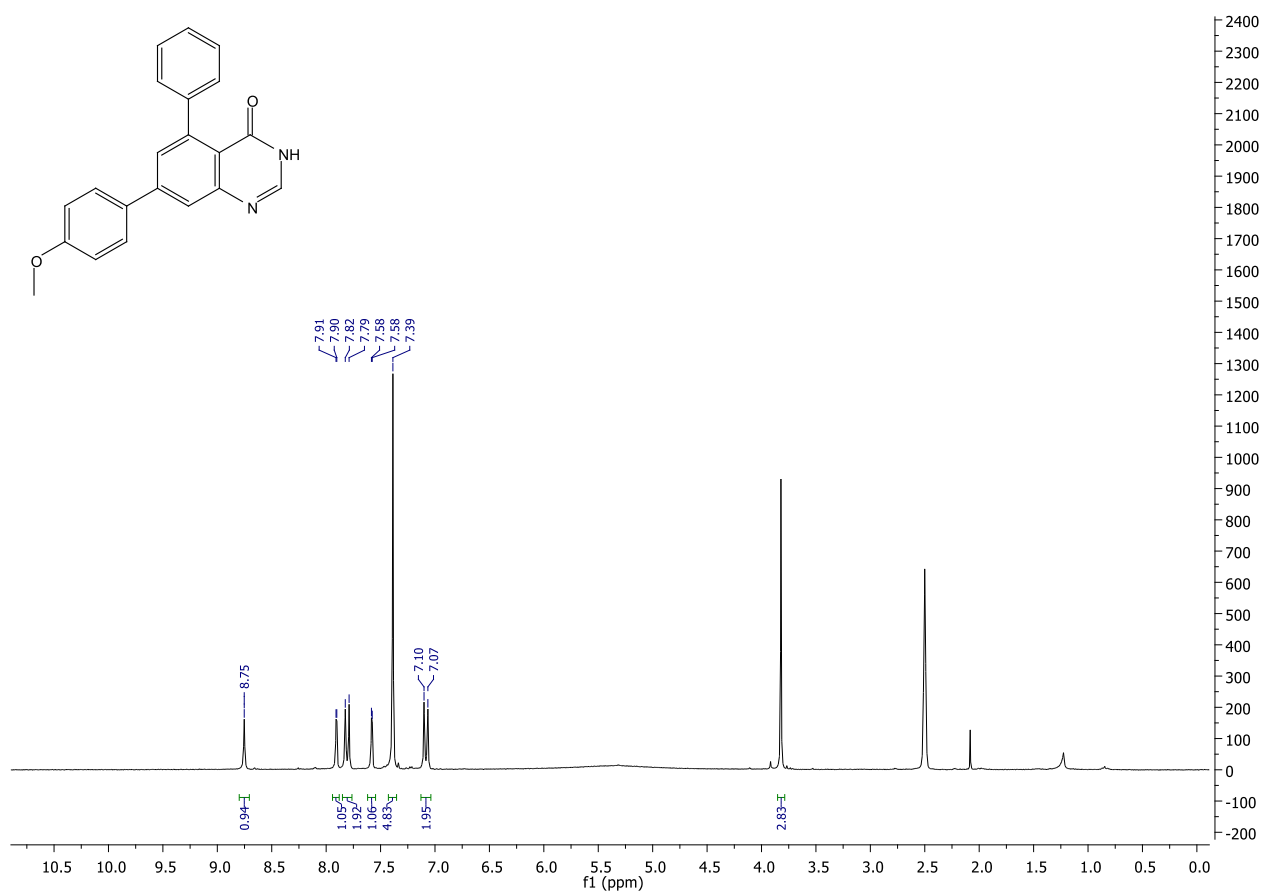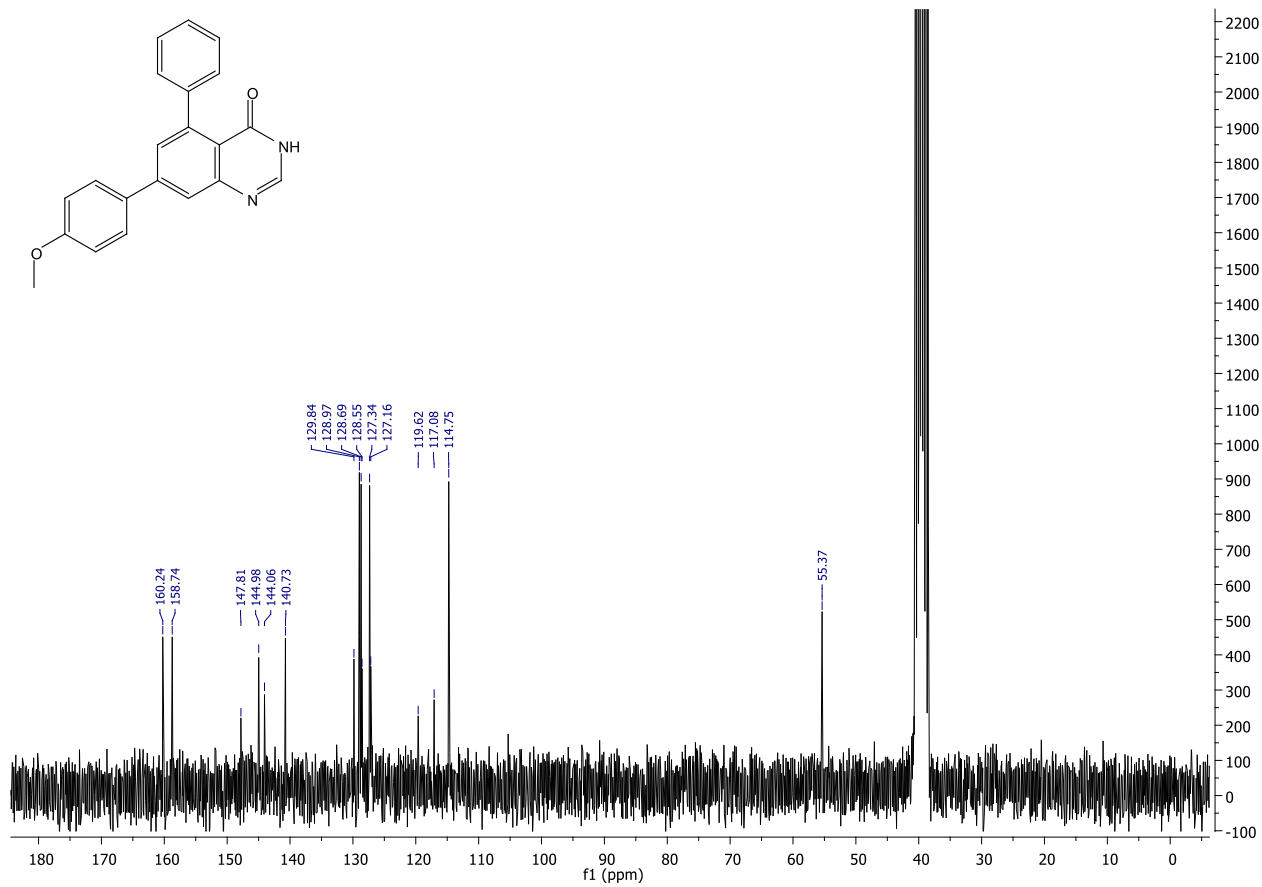

5-(4-Nitrophenyl)-7-phenylquinazolin-4(3H)-one **8e**

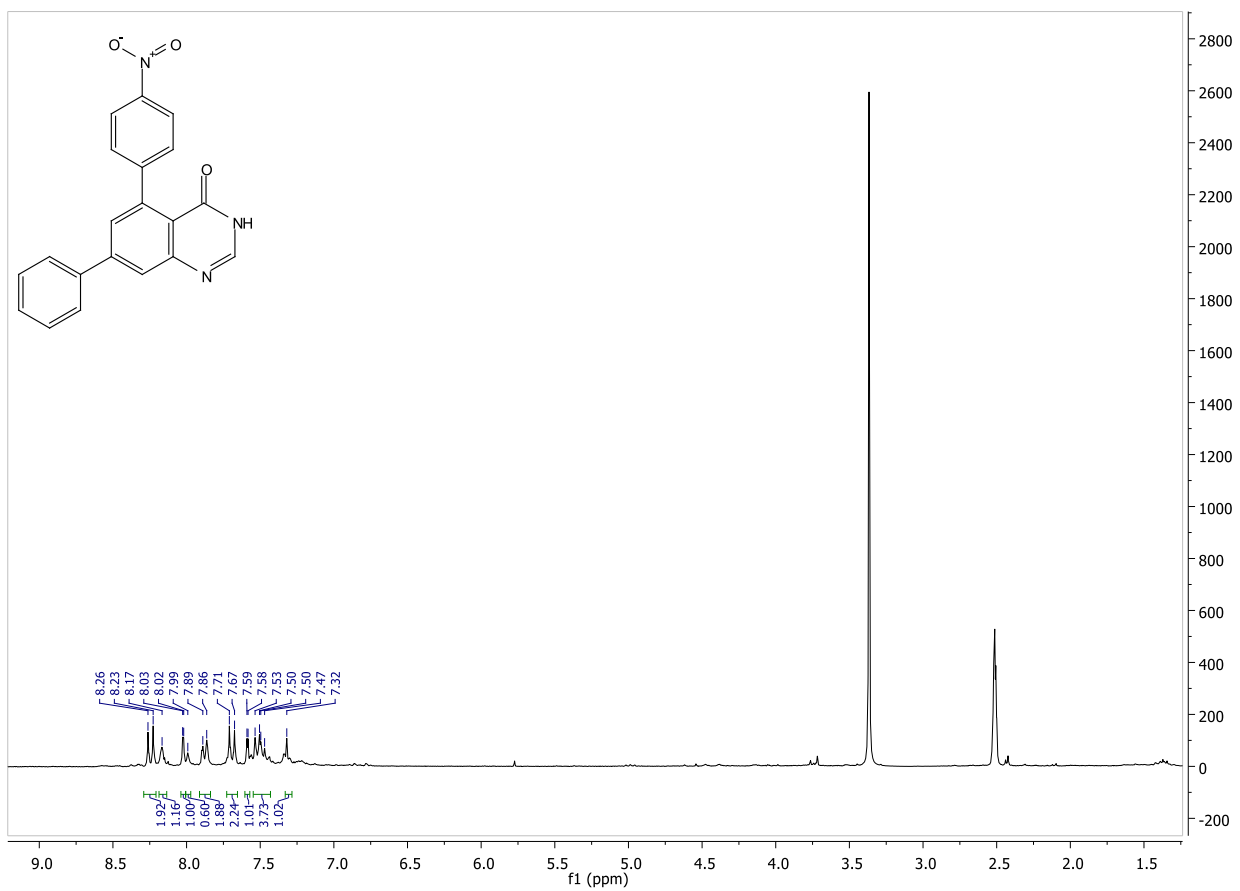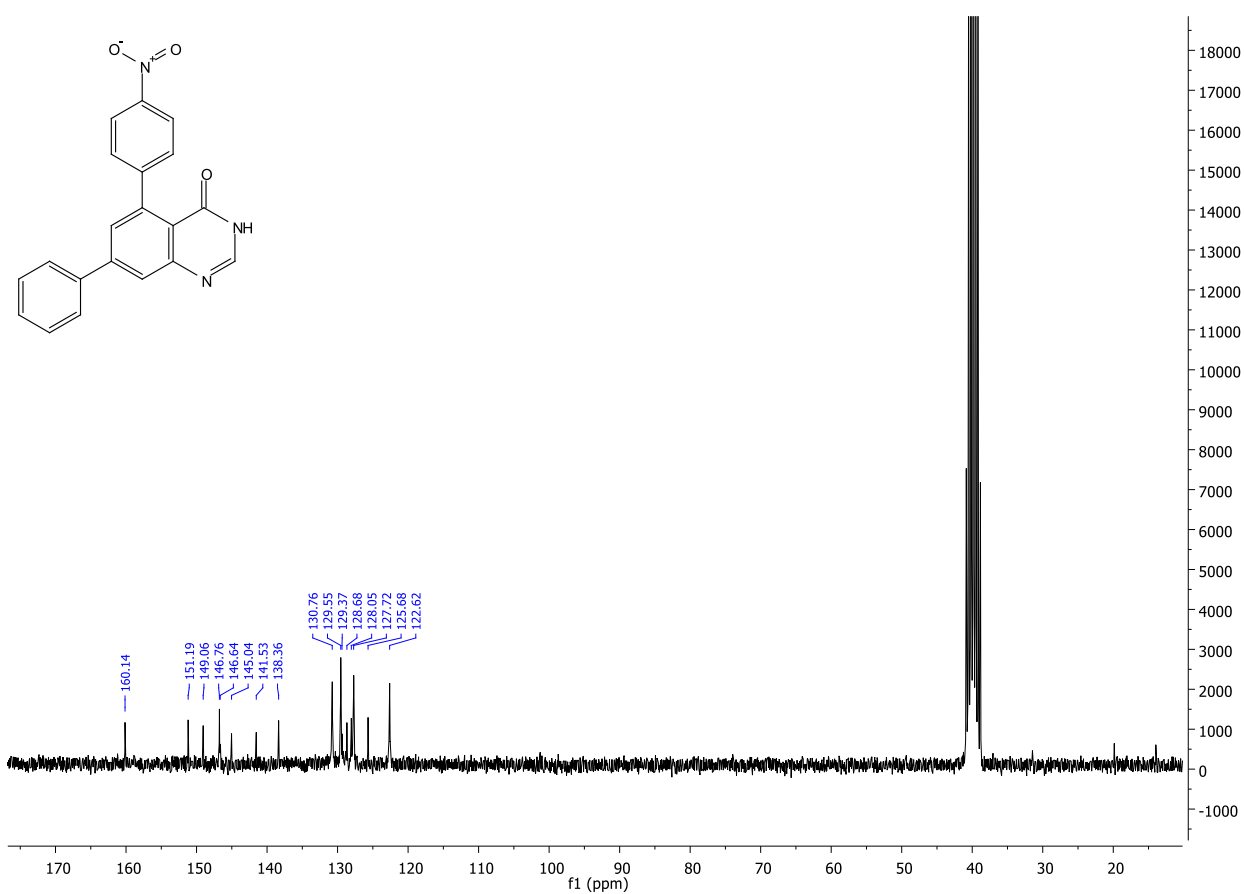

5,7-Bis(4-chlorophenyl)quinazolin-4(3H)-one **8f**

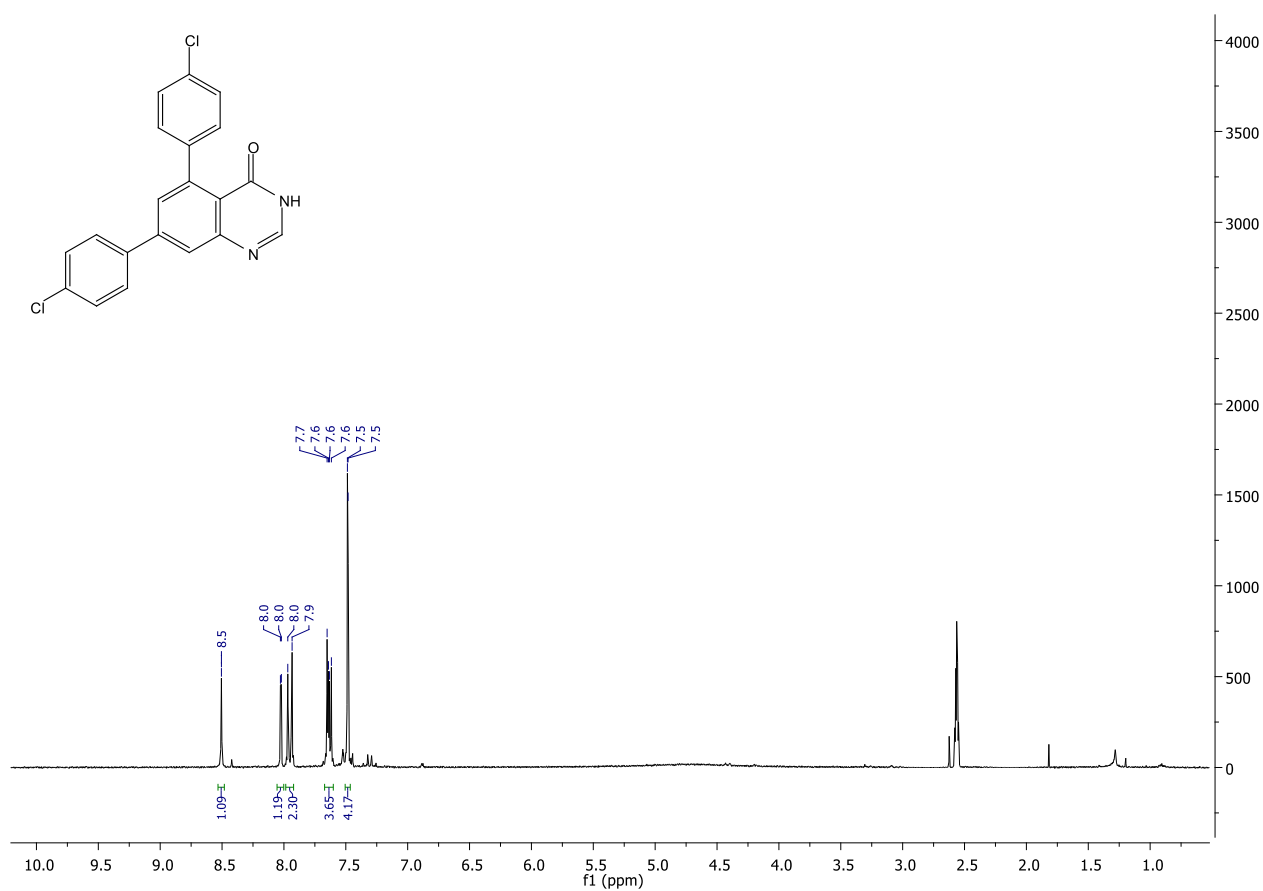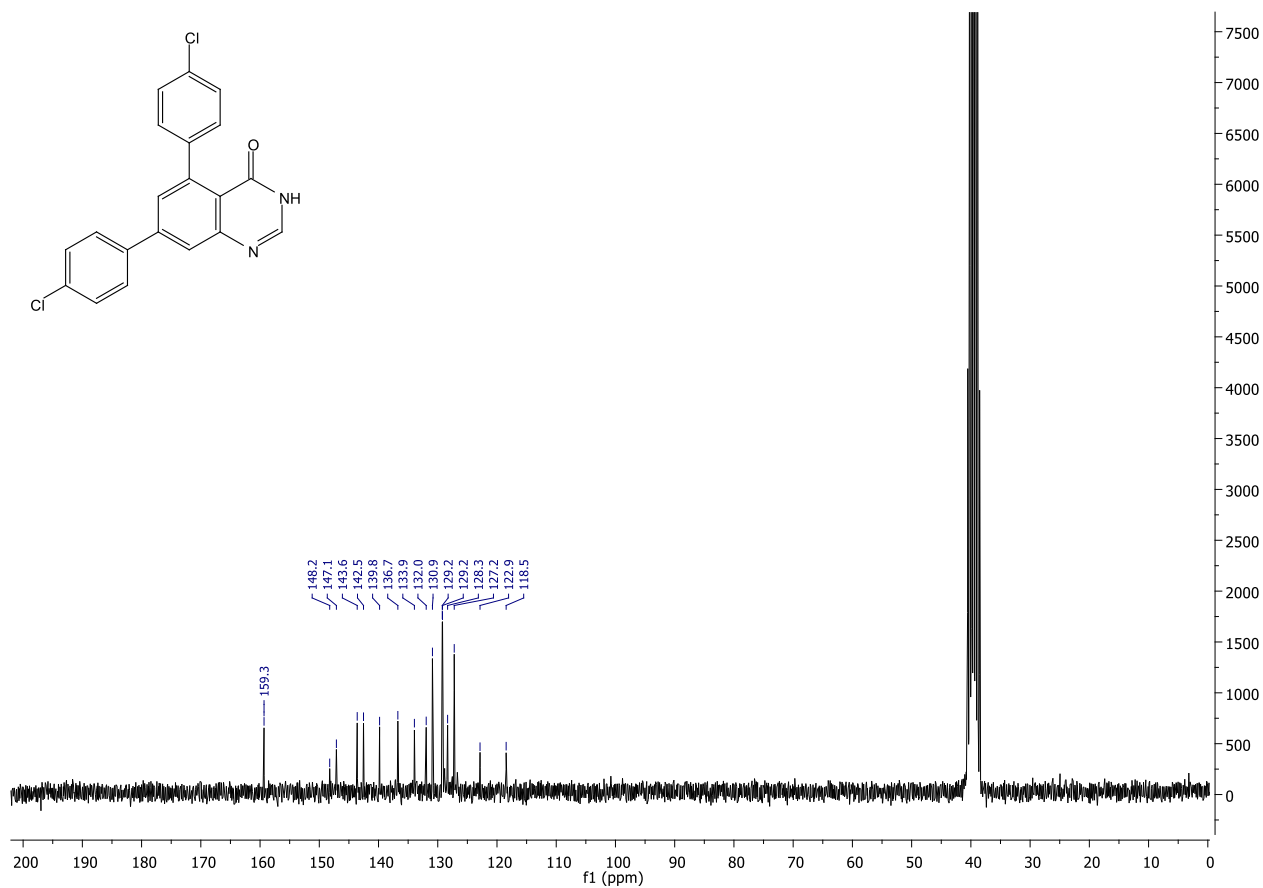

5-(4-Bromophenyl)-7-(4-chlorophenyl)quinazolin-4(3H)-one **8g**

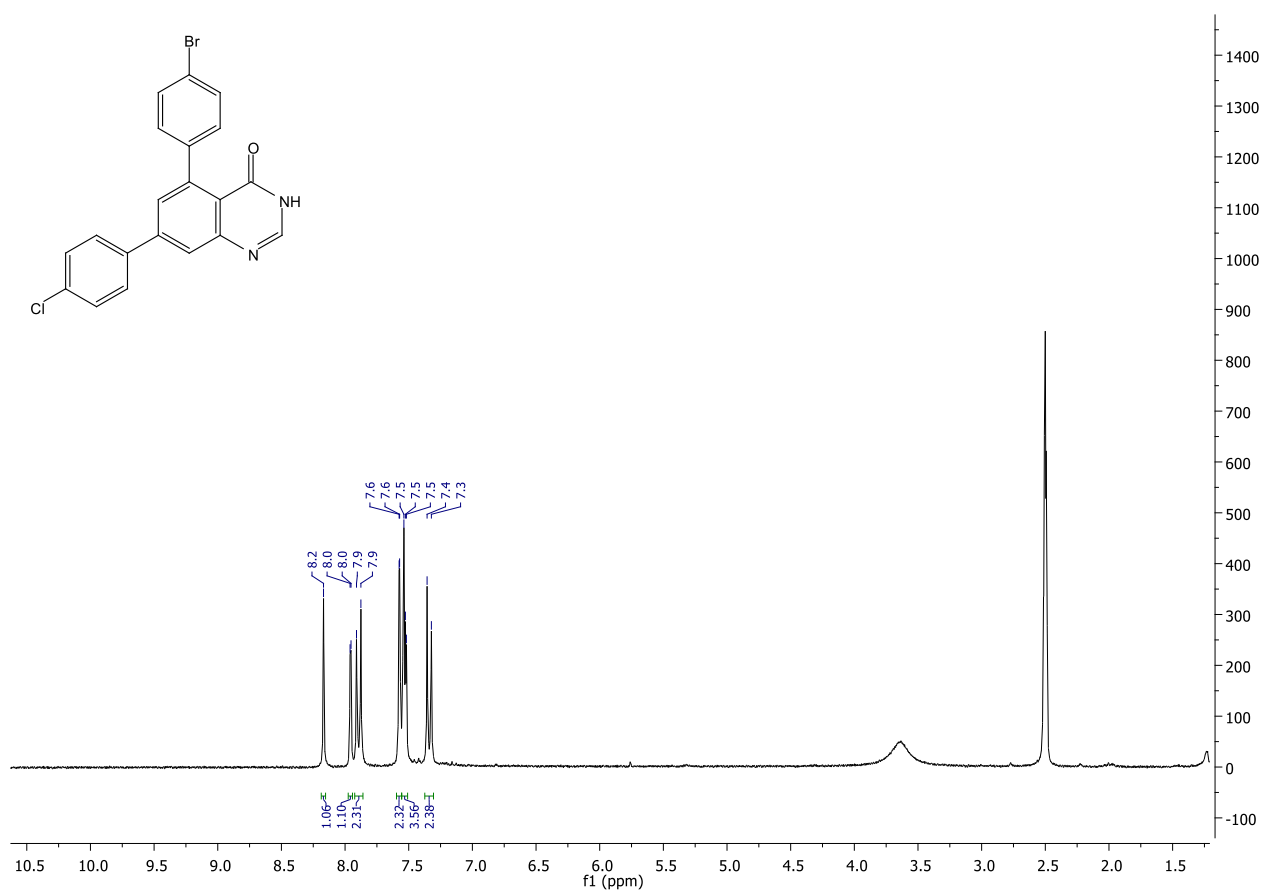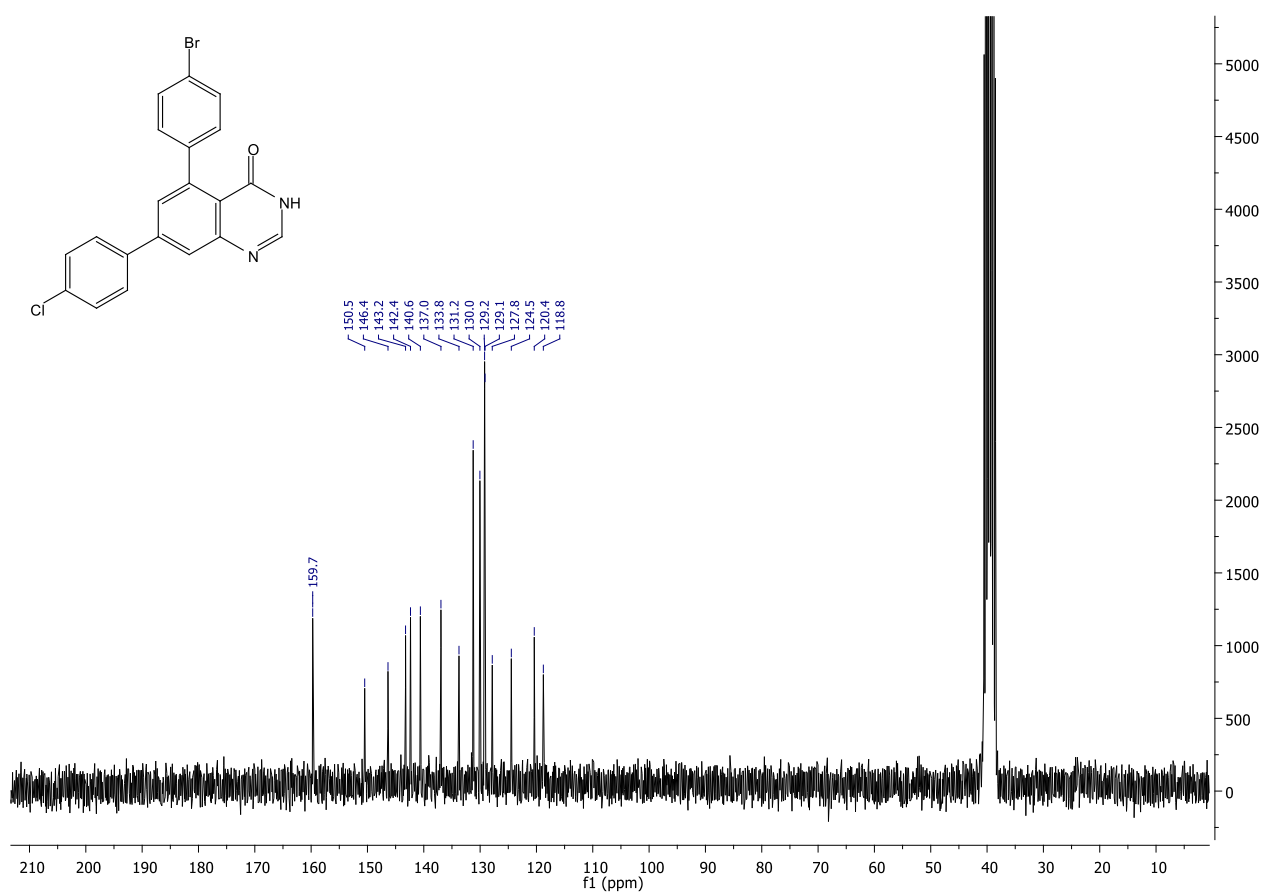

7-(4-Chlorophenyl)-5-phenylquinazolin-4(3H)-one **8h**

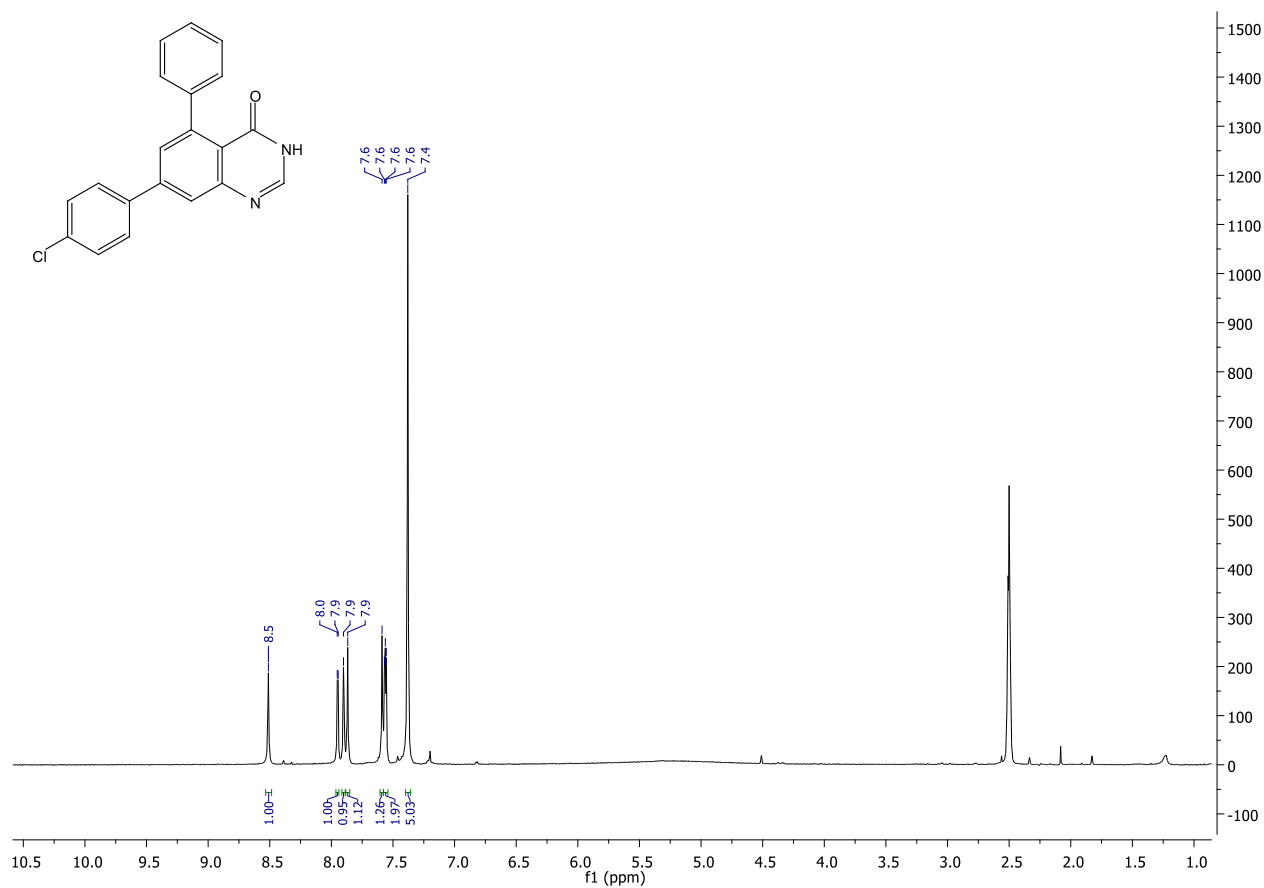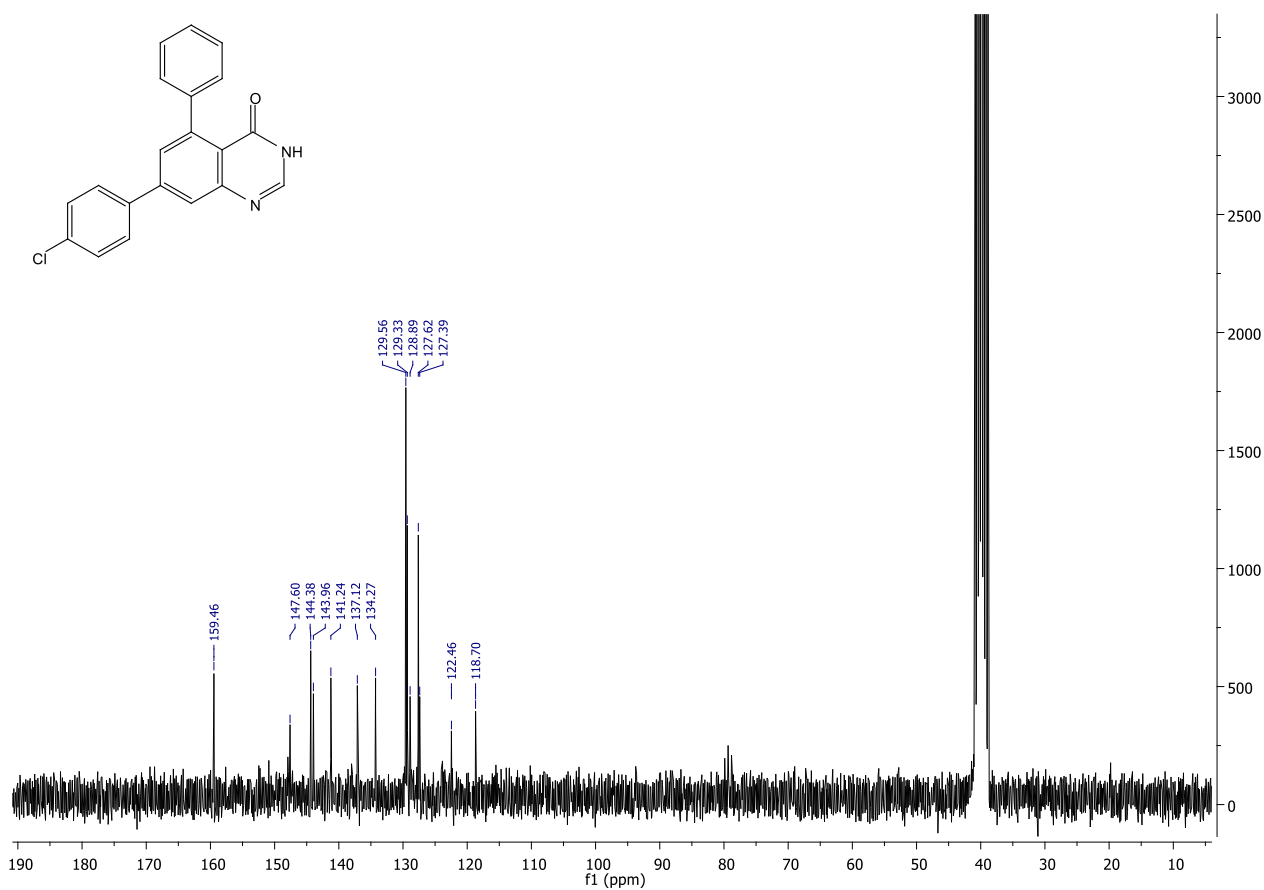



5-(4-Chlorophenyl)-7-phenylquinazolin-4(3H)-one **8i**

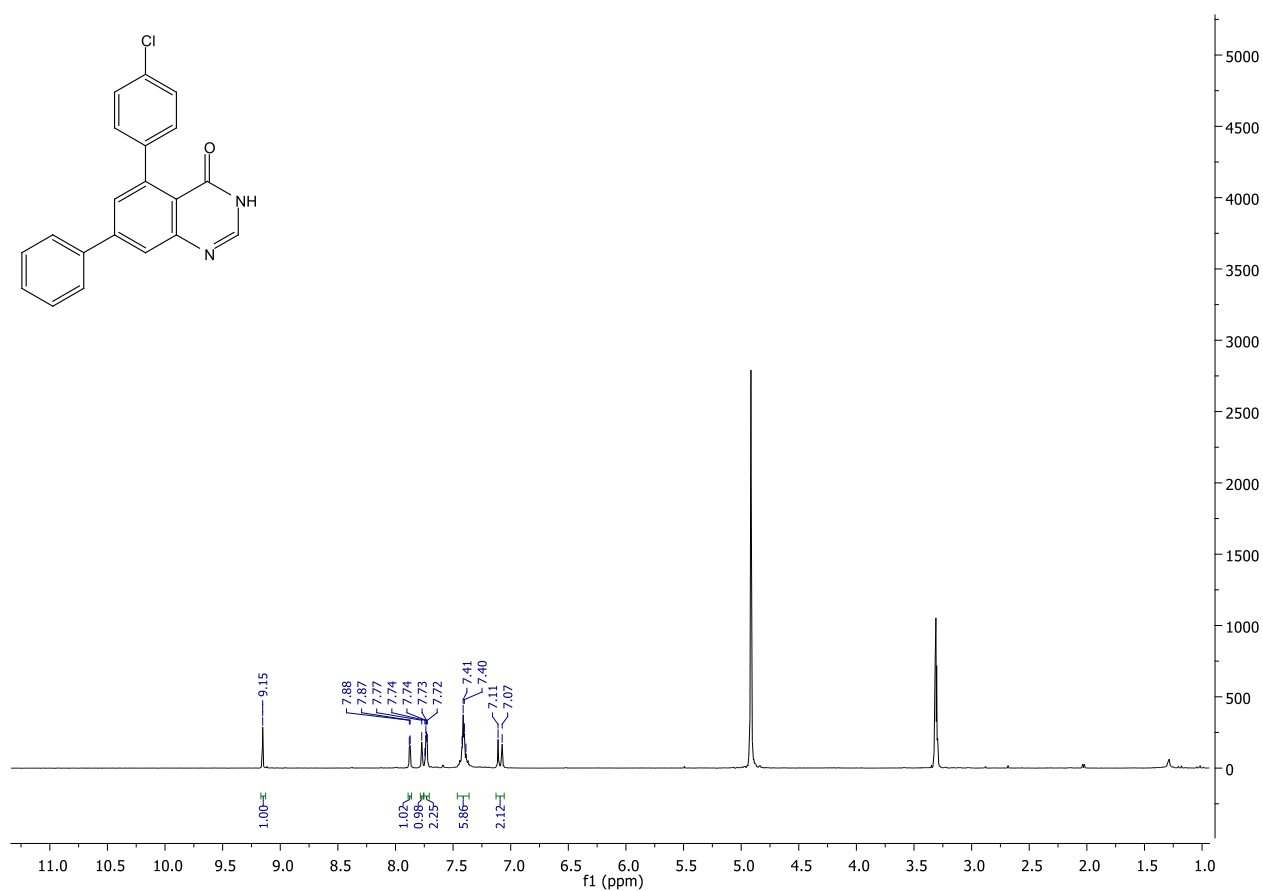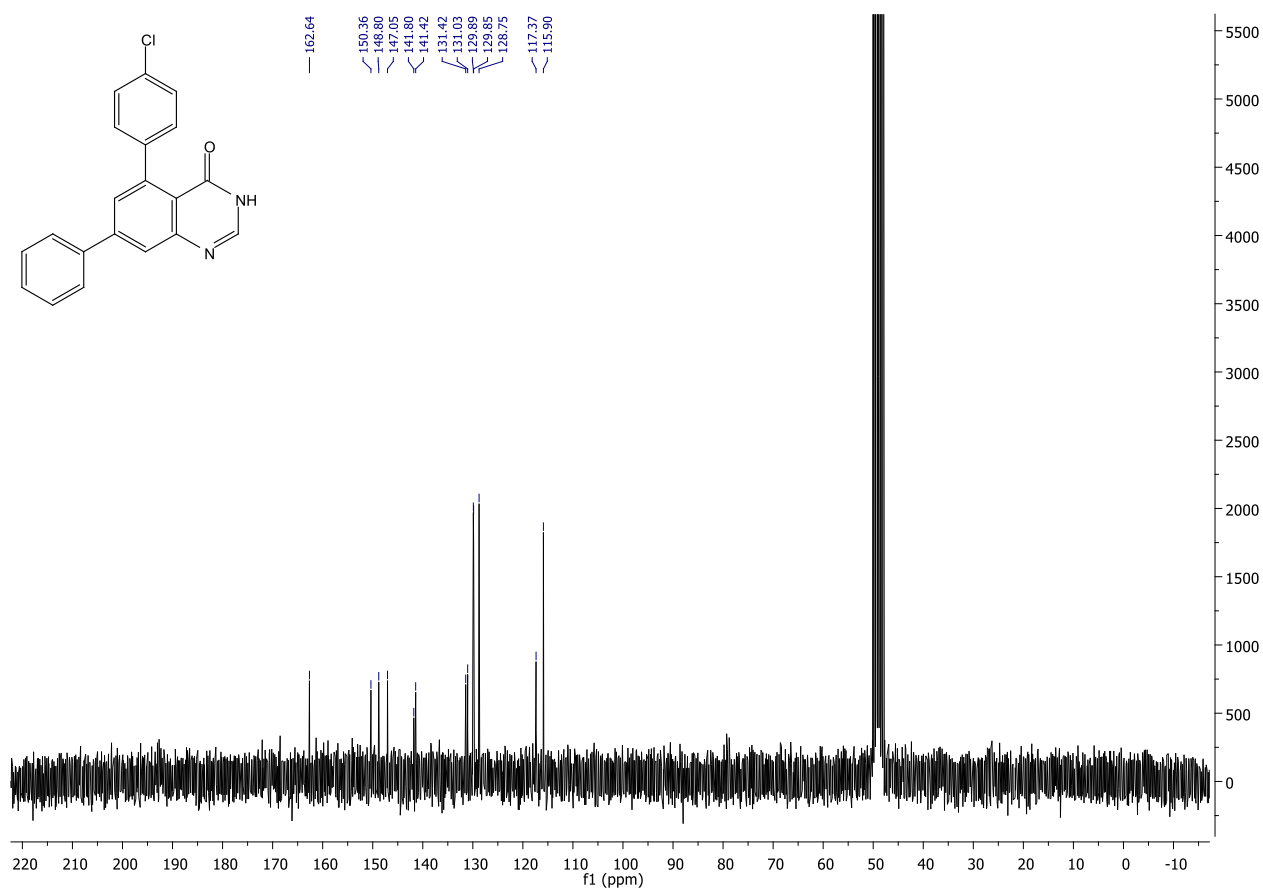

5,7-di-(2-Furyl)-quinazolin-4(3H)-one **8j**. . . . .

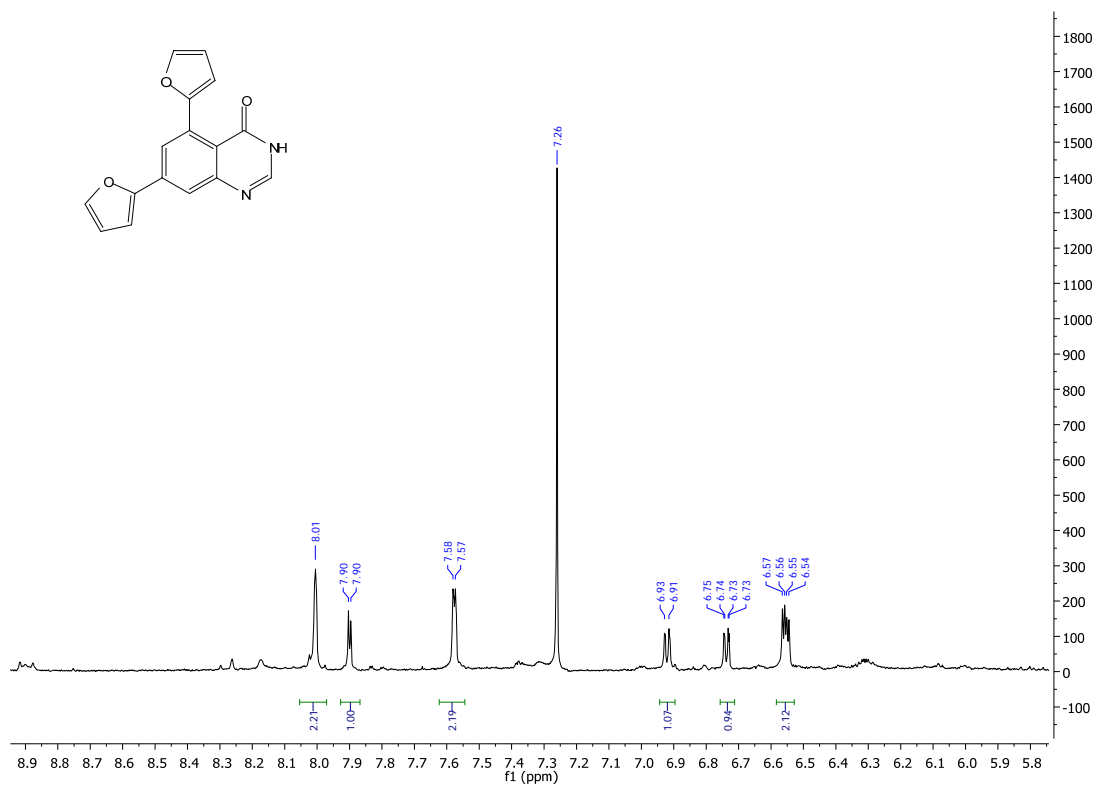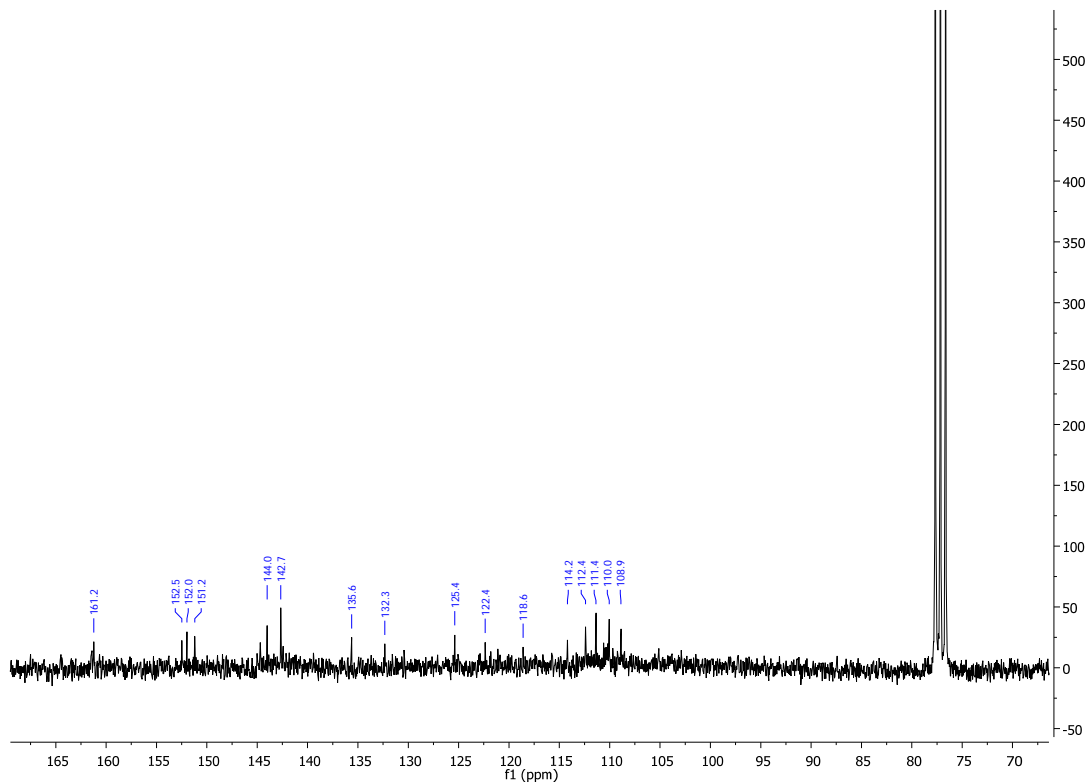

Supplement: c2gc36221j.pdf [file c2gc36221j.pdf]
